# Supplementary material for: A novel D-ring modified taxoid: synthesis and biological evaluation of a γ-lactone analogue of docetaxel
Source: Royal Society of Chemistry journal article supplement (doi:10.1039/c1ob06535a), 2011-10-04
Supplement: c1ob06535a.pdf [file c1ob06535a.pdf]

Electronic Supplementary Information For:

**A Novel D-ring Modified Taxoid: Synthesis and Biological Evaluation  
of a  $\gamma$ -Lactone Analogue of Docetaxel**

Feng Gao,<sup>a,b</sup> Zhan-Kun Yang,<sup>a</sup> Qiao-Hong Chen,<sup>a</sup> Xiao-Guang Chen,<sup>c</sup>  
and Feng-Peng Wang\*<sup>a</sup>

<sup>a</sup> Department of Chemistry of Medicinal Natural Products, Sichuan University, No. 17, Duan 3, Renmin Nan Road, Chengdu 610041, P. R. China

<sup>b</sup> Department of Chinese Traditional Medicine, Agronomy College, Sichuan Agricultural University, No. 221, Huiming Road, Wenjing Region, Chengdu 611130, P. R. China

<sup>c</sup> Department of Pharmacology, Institute of Materia Medica, Chinese Academy of Medical Sciences, Beijing 100050, P. R. China

**Table of Contents**

|                                                                    |           |
|--------------------------------------------------------------------|-----------|
| <b>NMR Data for Key Compounds 12 and 13.....</b>                   | <b>S2</b> |
| <b>NMR Data for Compounds 15.....</b>                              | <b>S3</b> |
| <b>NMR Data for key Compounds 16.....</b>                          | <b>S4</b> |
| <b>Copies of NMR spectrum diagram for synthetic Compounds.....</b> | <b>S5</b> |

**Table 1.**  $^1\text{H}$ -NMR and  $^{13}\text{C}$ -NMR Spectroscopic Data for Compounds **12** and **13**

| Position                                                                 | <b>12</b>            |                      | <b>13</b>            |                      |
|--------------------------------------------------------------------------|----------------------|----------------------|----------------------|----------------------|
|                                                                          | $^1\text{H}$ -NMR    | $^{13}\text{C}$ -NMR | $^1\text{H}$ -NMR    | $^{13}\text{C}$ -NMR |
| 1                                                                        | —                    | 90.1 s               | —                    | 90.2 s               |
| 2                                                                        | 4.24 d (4.8)         | 72.1 d               | 4.23 d (4.4)         | 72.1 d               |
| 3                                                                        | 3.50 d (4.8)         | 45.3 d               | 3.74 d (4.4)         | 43.4 d               |
| 4                                                                        | —                    | 74.0 s               | —                    | 75.4 s               |
| 5                                                                        | 5.32 t (2.8)         | 81.7 d               | 3.79 t (2.8)         | 81.1 d               |
| 6                                                                        | 2.00 m, 2.12 m       | 30.0 t               | 1.85 m, 2.24 m       | 30.6 t               |
| 7                                                                        | 5.20 dd (4.8, 11.6)  | 71.6 d               | 5.44 dd (4.4, 11.2)  | 71.4 d               |
| 8                                                                        | —                    | 59.0 s               | —                    | 59.1 s               |
| 9                                                                        | —                    | 201.9 s              | —                    | 202.0 s              |
| 10                                                                       | 6.44 s               | 78.0 d               | 6.48 s               | 78.3 d               |
| 11                                                                       | —                    | 132.0 s              | —                    | 132.0 s              |
| 12                                                                       | —                    | 143.8 s              | —                    | 144.2 s              |
| 13                                                                       | 5.82 dd (5.6, 8.4)   | 71.3 d               | 5.72 dd (2.4, 10.0)  | 69.8 d               |
| 14                                                                       | 3.13 dd (5.6, 15.2)  | 32.7 t               | 3.13 dd (4.0, 15.6)  | 32.5 t               |
|                                                                          | 2.64 dd (10.0, 15.2) |                      | 2.64 dd (10.0, 15.6) |                      |
| 15                                                                       | —                    | 41.1 s               | —                    | 40.6 s               |
| 16                                                                       | 1.15 s               | 19.5 q               | 1.15 s               | 18.8 q               |
| 17                                                                       | 1.28 s               | 26.0 q               | 1.22 s               | 27.1 q               |
| 18                                                                       | 2.31 s               | 16.1 q               | 2.29 s               | 16.6 q               |
| 19                                                                       | 1.29 s               | 12.7 a               | 1.35 s               | 12.7 q               |
| 20                                                                       | 4.08 ABq (9.2)       | 62.9 t               | 4.52 ABq (12.0)      | 64.7 t               |
|                                                                          | 3.59 dABq(6.0, 9.2)  |                      | 4.41 ABq (12.0)      |                      |
| $\text{O}_2\text{C}=\text{O}$                                            | —                    | 151.9 s              | —                    | 151.8 s              |
| $\begin{array}{c} (\text{CH}_3)_3 \\   \\ \text{C}-\text{O} \end{array}$ | 1.44, 1.47, 1.49, s  | 27.6 q               | 1.44, 1.47, 1.50, s  | 27.7 q               |
| $\text{C}=\text{O}$                                                      | —                    | 83.0 s               | —                    | 82.8 s               |
| $\begin{array}{c} \text{C}=\text{O} \\   \\ \text{CH}_3 \end{array}$     | —                    | 171.0 s              | —                    | 170.5 s              |
|                                                                          | 2.34 s               | 21.3 q               | 2.13 s               | 20.7 q               |

**Table 2** NMR Data for Compound **15** (400 Mz for  $^1\text{H}$  and 100 Mz for  $^{13}\text{C}$ )

| Position                                                                           | $\delta_{\text{H}}$ | Mult ( $J = \text{Hz}$ ) | $\delta_{\text{C}}$ | HMBC (H $\rightarrow$ C)      |
|------------------------------------------------------------------------------------|---------------------|--------------------------|---------------------|-------------------------------|
| 1                                                                                  | —                   | —                        | 90.6 s              | —                             |
| 2                                                                                  | 4.46                | d (6.8)                  | 80.5 d              | C-1, C-3, C-8, C-14, C-15     |
| 3                                                                                  | 2.70                | d (6.8)                  | 46.4 d              | C-1, C-2, C-4, C-7, C-8, C-20 |
| 4                                                                                  | —                   | —                        | 77.1 s              | —                             |
| 5                                                                                  | 4.61                | t (5.2)                  | 81.8 d              | C-3, C-4, C-7                 |
| 6                                                                                  | 2.28                | m ( $\alpha$ )           | 29.2 t              | C-4, C-5, C-7, C-8            |
|                                                                                    | 2.32                | m ( $\beta$ )            |                     | C-4, C-5, C-7, C-8            |
| 7                                                                                  | 5.15                | dd (6.4, 8.0)            | 71.5 d              | C-6, C-8, C-9, C-19, C-Boc    |
| 8                                                                                  | —                   | —                        | 57.8 s              | —                             |
| 9                                                                                  | —                   | —                        | 202.2 s             | —                             |
| 10                                                                                 | 6.37                | s                        | 77.8 d              | C-9, C-11, C-12, C-15, C-Boc  |
| 11                                                                                 | —                   | —                        | 131.2 s             | —                             |
| 12                                                                                 | —                   | —                        | 142.9 s             | —                             |
| 13                                                                                 | 5.72                | dd (3.6, 7.2)            | 70.7 s              | C-11, C-12, C-Boc             |
| 14                                                                                 | 2.21                | m                        | 34.1 t              | C-1, C-2, C-13, C-15          |
|                                                                                    | 2.90                | dd (9.6, 16.0)           |                     | C-1, C-2, C-12, C-13          |
| 15                                                                                 | —                   | —                        | 40.4 s              | —                             |
| 16                                                                                 | 1.20                | s                        | 19.0 q              | C-1, C-11, C-15, C-17         |
| 17                                                                                 | 1.23                | s                        | 26.7 q              | C-1, C-11, C-15, C-16         |
| 18                                                                                 | 2.19                | s                        | 16.4 q              | C-1, C-11, C-12, C-13         |
| 19                                                                                 | 1.53                | s                        | 13.5 q              | C-3, C-7, C-8                 |
| 20                                                                                 | 2.79                | ABq (12.0)               | 46.1 t              | C-3, C-4, C-21                |
|                                                                                    | 3.03                | ABq (12.0)               |                     | C-3, C-4, C-5, C-21           |
| 21                                                                                 | —                   | —                        | 170.6 s             | —                             |
| $\begin{array}{c} \text{O} \\   \\ \text{C}=\text{O} \\   \\ \text{O} \end{array}$ | —                   | —                        | 151.8               | —                             |
| $\begin{array}{c} (\text{CH}_3)_3 \\   \\ \text{C}-\text{O} \end{array}$           | 1.48                | s                        | 27.6 q              | C-Boc                         |
| $\begin{array}{c} (\text{CH}_3)_3 \\   \\ \text{C}-\text{O} \end{array}$           | —                   | —                        | 83.4 s              | —                             |

**Table 3** NMR Data for Compound **16** (400 Mz for  $^1\text{H}$  and 100 Mz for  $^{13}\text{C}$ )

| Position                                    | $\delta_{\text{H}}$ | Mult ( $J = \text{Hz}$ ) | $\delta_{\text{C}}$ | HMBC (H $\rightarrow$ C)      |
|---------------------------------------------|---------------------|--------------------------|---------------------|-------------------------------|
| 1                                           | —                   | —                        | 78.6 s              | —                             |
| 2                                           | 4.05                | d (6.4)                  | 74.1 d              | C-1, C-3, C-8, C-14           |
| 3                                           | 2.84                | d (6.4)                  | 48.0 d              | C-1, C-2, C-4, C-7, C-8, C-20 |
| 4                                           | —                   | —                        | 76.9 s              | —                             |
| 5                                           | 4.61                | t (3.6)                  | 81.6 d              | C-3, C-4, C-7                 |
| 6                                           | 2.15                | m ( $\alpha$ )           | 27.3 t              | C-7                           |
|                                             | 2.28                | m ( $\beta$ )            |                     | C-7                           |
| 7                                           | 5.00                | dd (4.8, 10.8)           | 72.3d               | C-6, C-8, C-9, C-19, C-Boc    |
| 8                                           | —                   | —                        | 57.0 s              | —                             |
| 9                                           | —                   | —                        | 202.5 s             | —                             |
| 10                                          | 6.30                | s                        | 77.1d               | C-9, C-11, C-12, C-15, C-Boc  |
| 11                                          | —                   | —                        | 132.4 s             | —                             |
| 12                                          | —                   | —                        | 141.0 s             | —                             |
| 13                                          | 5.73                | t (7.2)                  | 71.5 s              | C-11, C-12, C-Boc             |
| 14                                          | 2.31                | m                        | 35.6 t              | C-1, C-2, C-12, C-13, C-15    |
|                                             | 2.38                | m                        |                     | C-1, C-2, C-12, C-13, C-15    |
| 15                                          | —                   | —                        | 42.2 s              | —                             |
| 16                                          | 1.08                | s                        | 19.4 q              | C-1, C-11, C-15, C-17         |
| 17                                          | 1.15                | s                        | 26.3 q              | C-1, C-11, C-15, C-16         |
| 18                                          | 2.05                | s                        | 15.2 q              | C-1, C-9, C-11, C-12, C-13    |
| 19                                          | 1.56                | s                        | 12.1 q              | C-3, C-9, C-8, C-13           |
| 20                                          | 2.73                | ABq (12.4)               | 48.3 t              | C-3, C-4, C-21                |
|                                             | 3.20                | ABq (12.4)               |                     | C-3, C-4, C-5, C-21           |
| 21                                          | —                   | —                        | 172.4 s             | —                             |
| (CH <sub>3</sub> ) <sub>3</sub><br> <br>C—O | 1.49                | s                        | 27.4 q              | C-Boc                         |
|                                             | —                   | —                        | 82.9 s              | —                             |

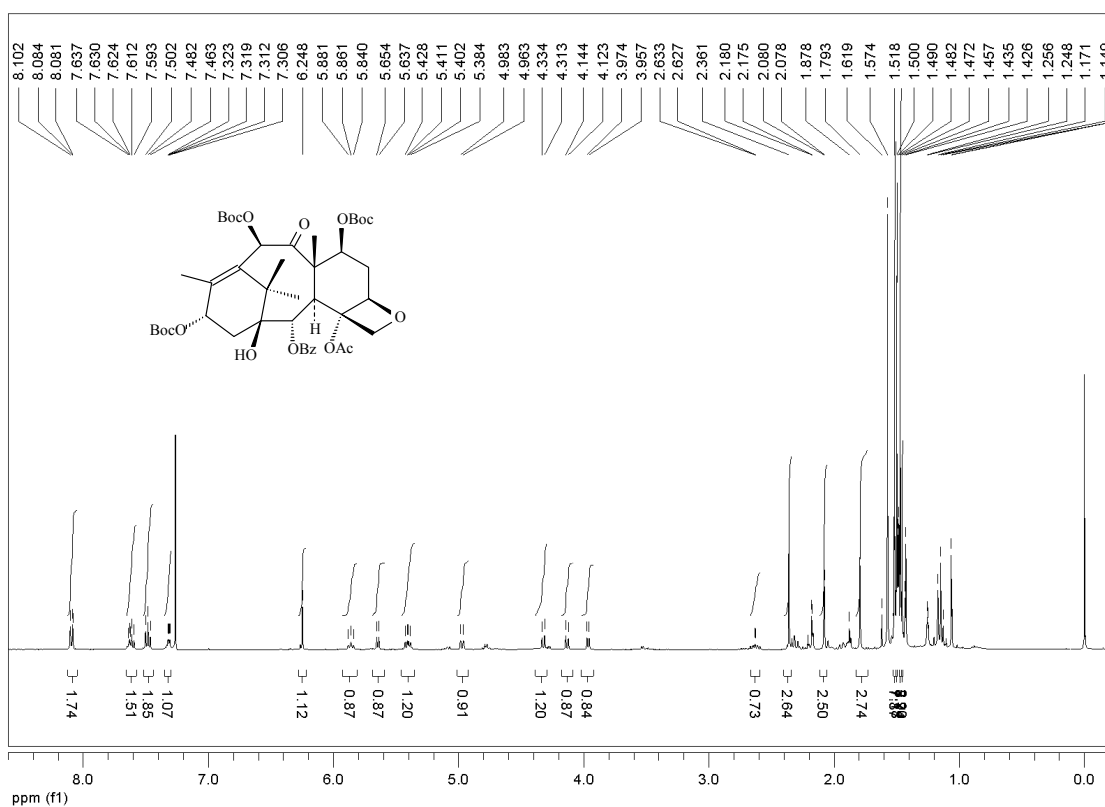

<sup>1</sup>H NMR spectrum of 7,10,13-triBoc-10-DAB

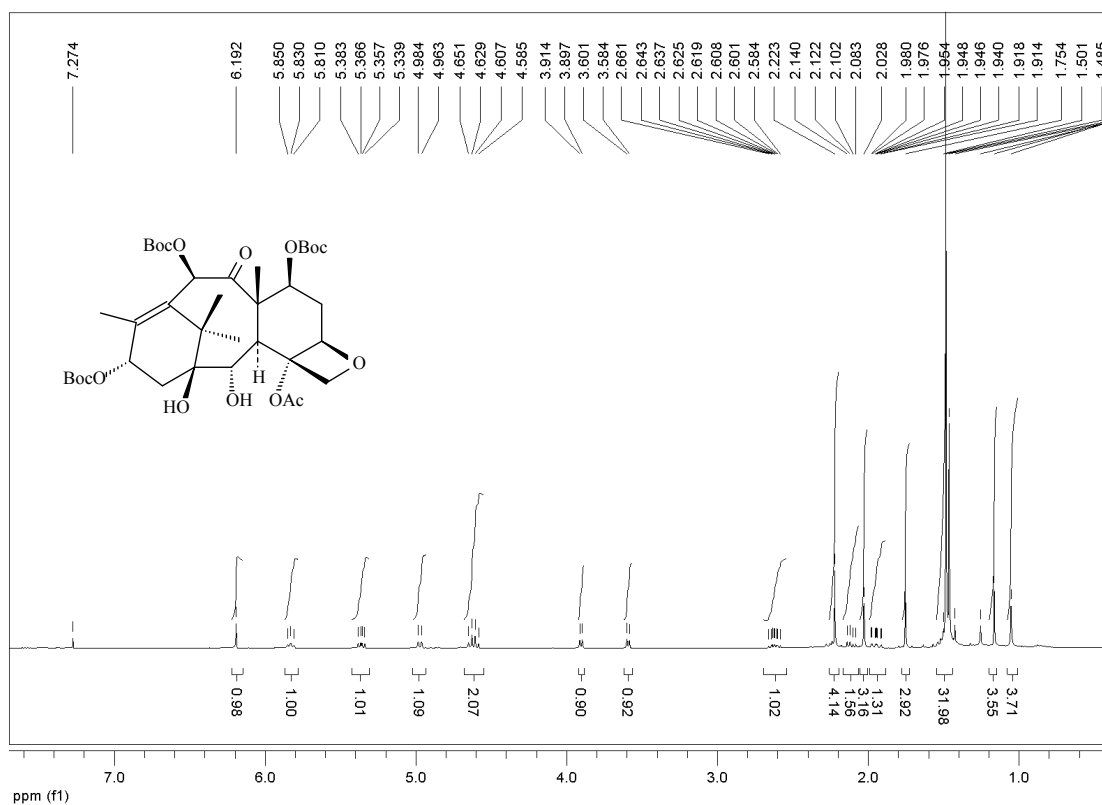

<sup>1</sup>H NMR spectrum of 7,10,13-triBoc-2-debenzoate-10-DAB

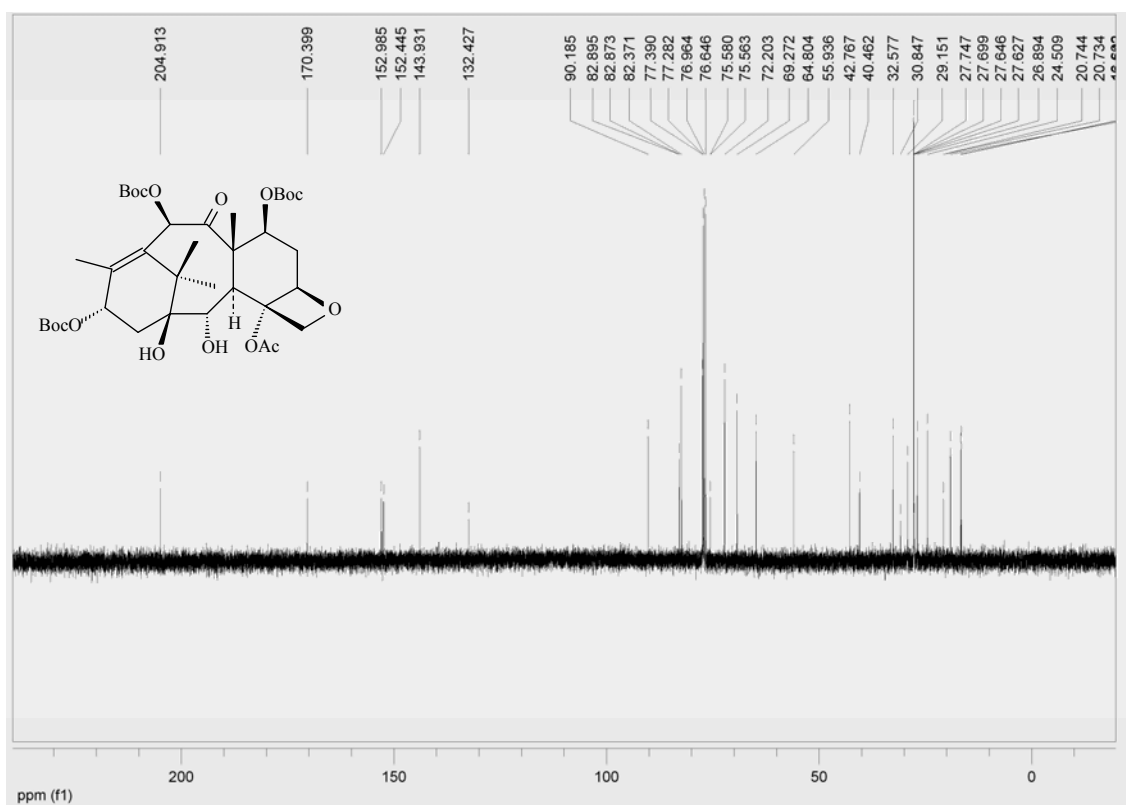

<sup>13</sup>C NMR spectrum of 7,10,13-triBoc-2-debenzoate-10-DAB

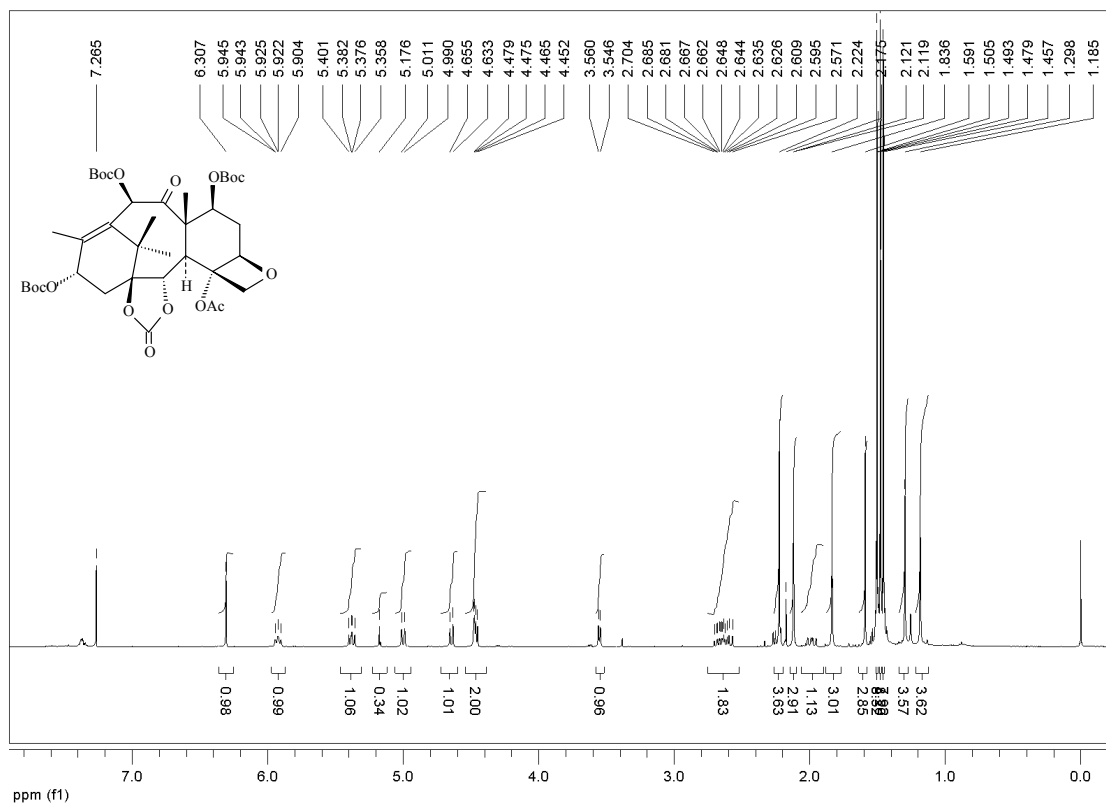

<sup>1</sup>H NMR spectrum of compound **11**

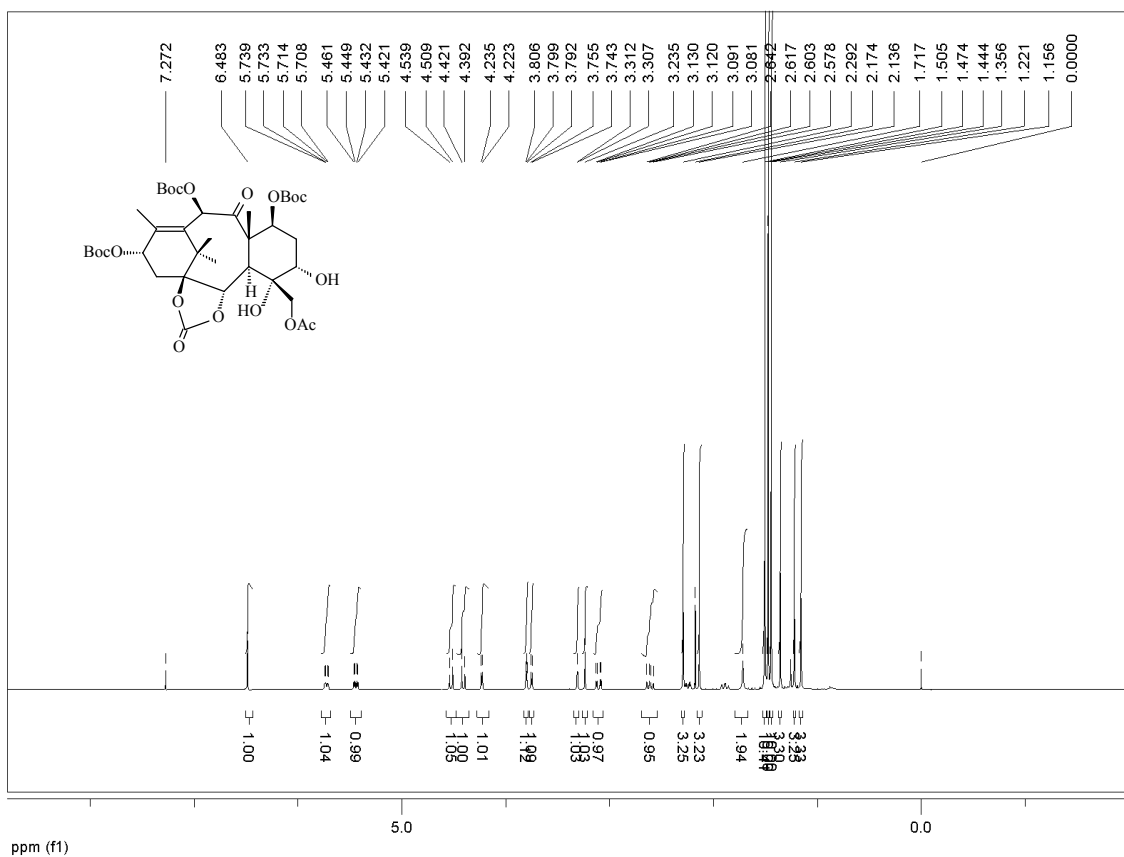

<sup>1</sup>H NMR spectrum of compound **12**

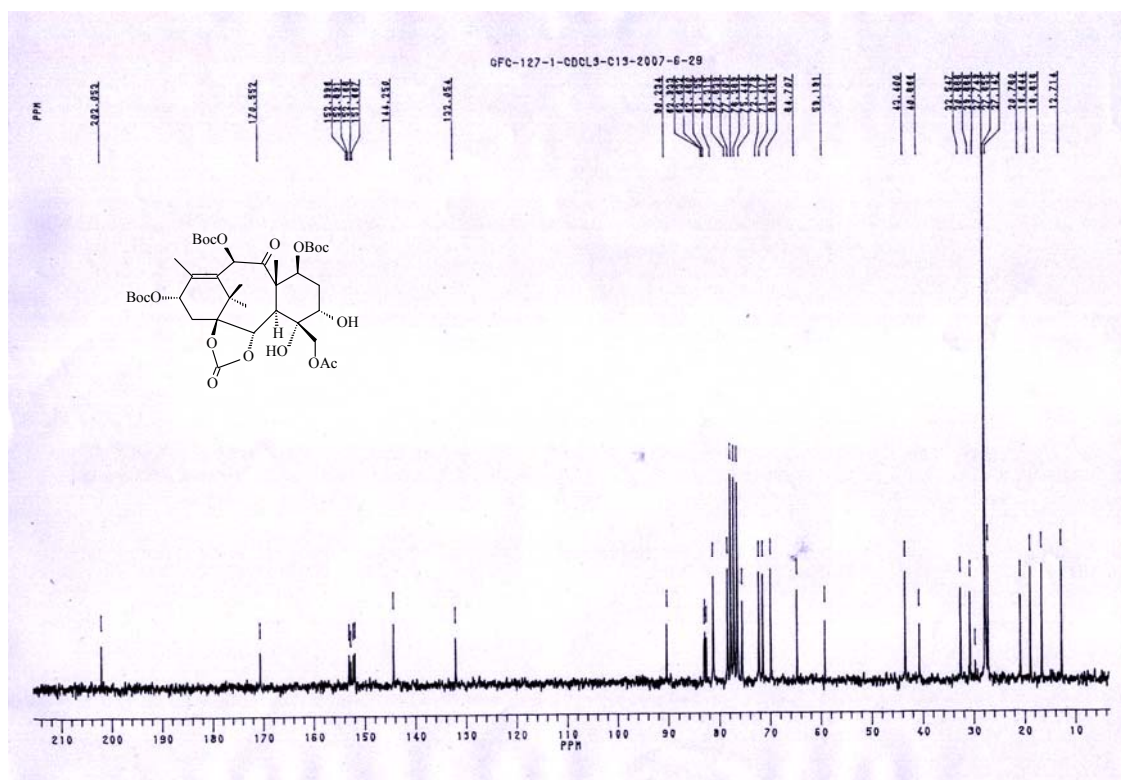

### <sup>13</sup>C NMR spectrum of compound 12

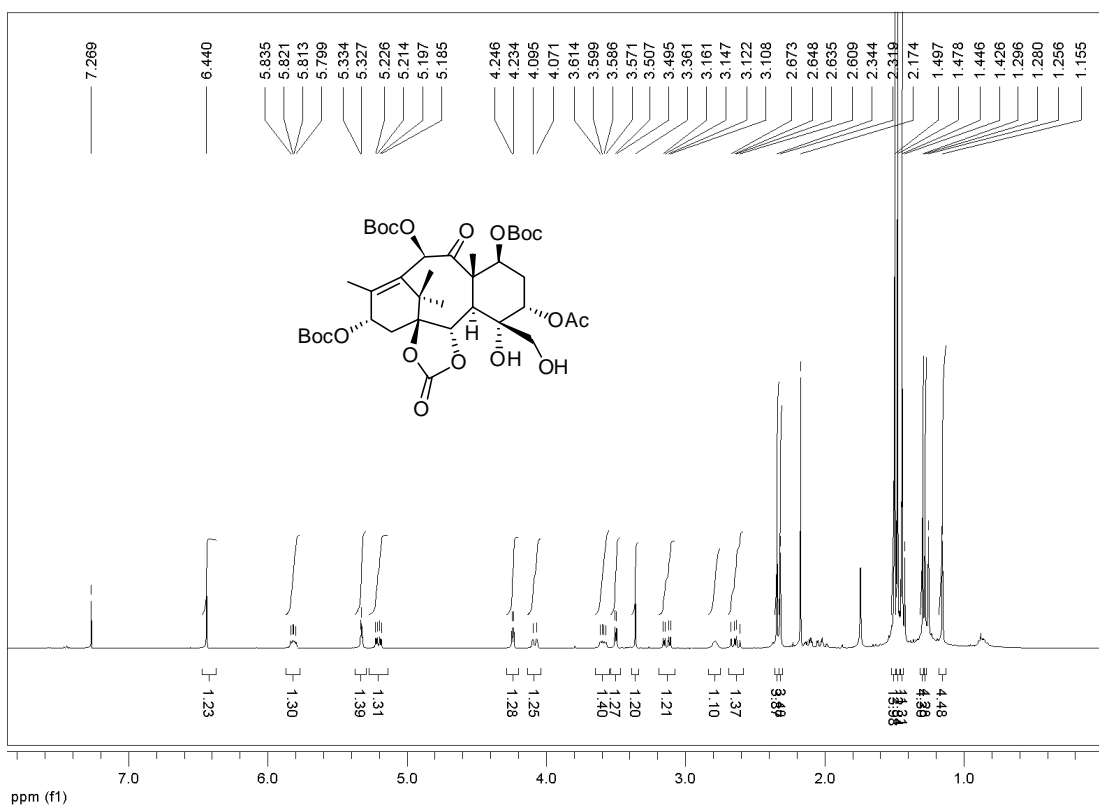

### <sup>1</sup>H NMR spectrum of compound 13

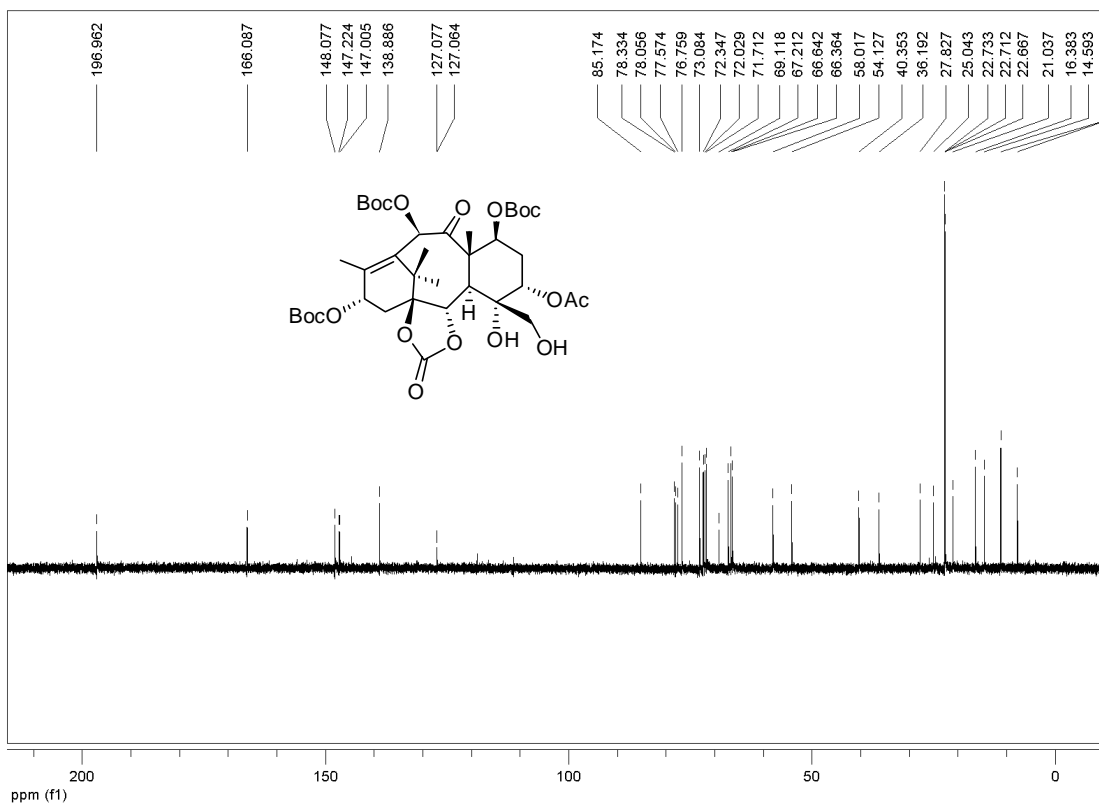



### <sup>13</sup>C NMR spectrum of compound **13**

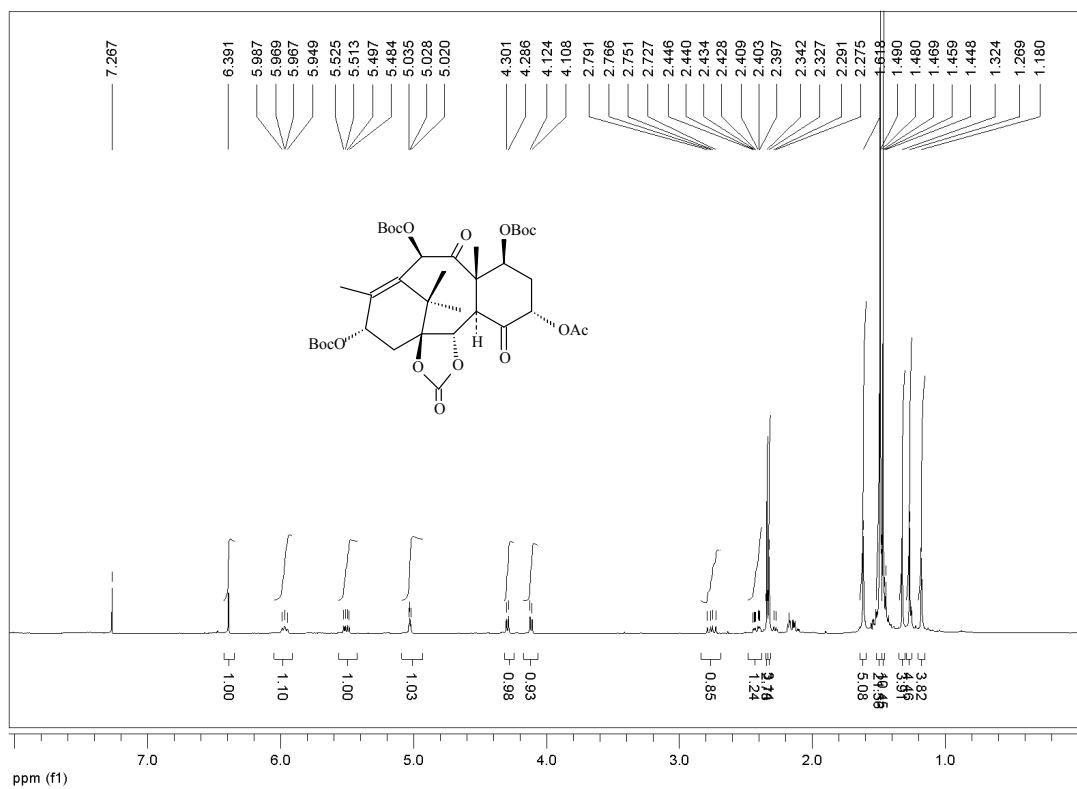

### <sup>1</sup>H NMR spectrum of compound **14**

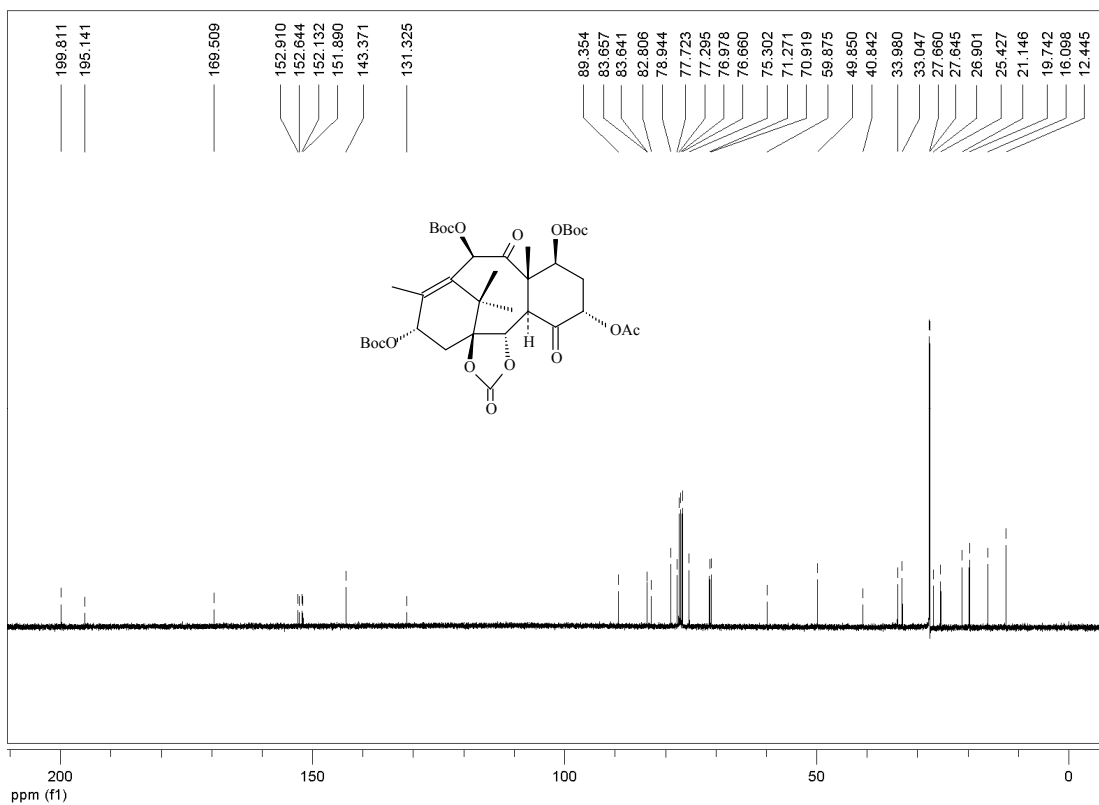

### <sup>13</sup>C NMR spectrum of compound **14**

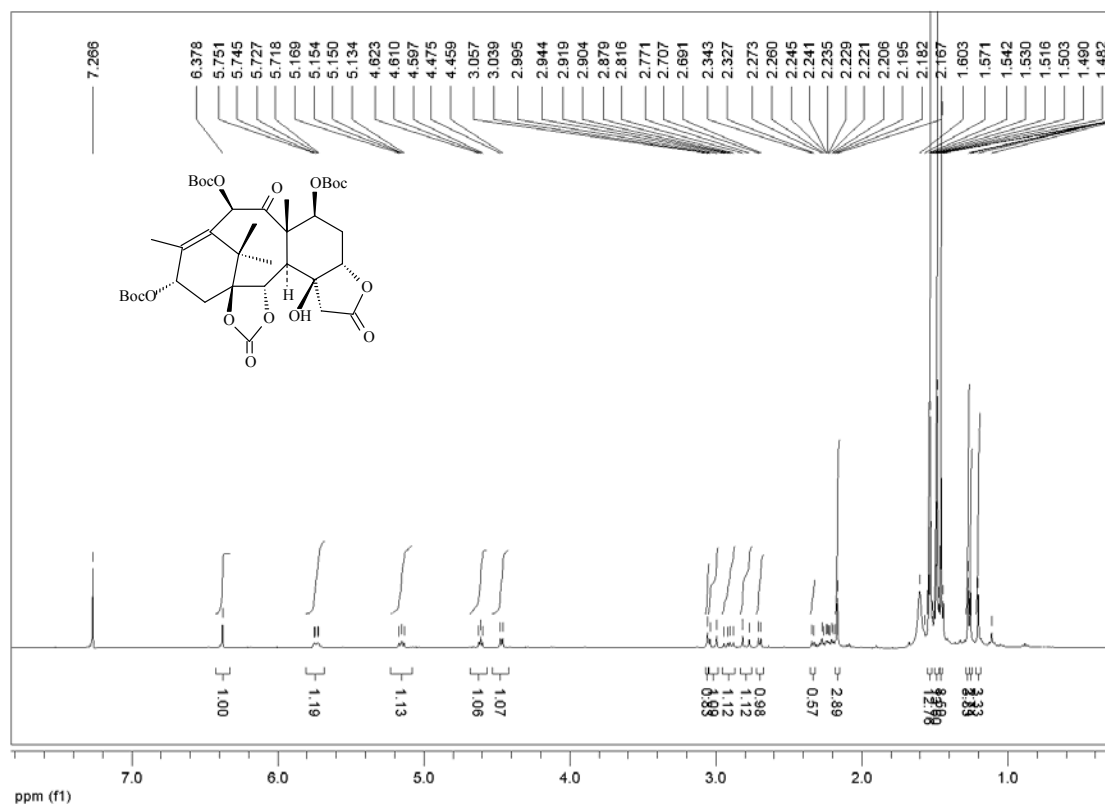

<sup>1</sup>H NMR spectrum of compound **15**

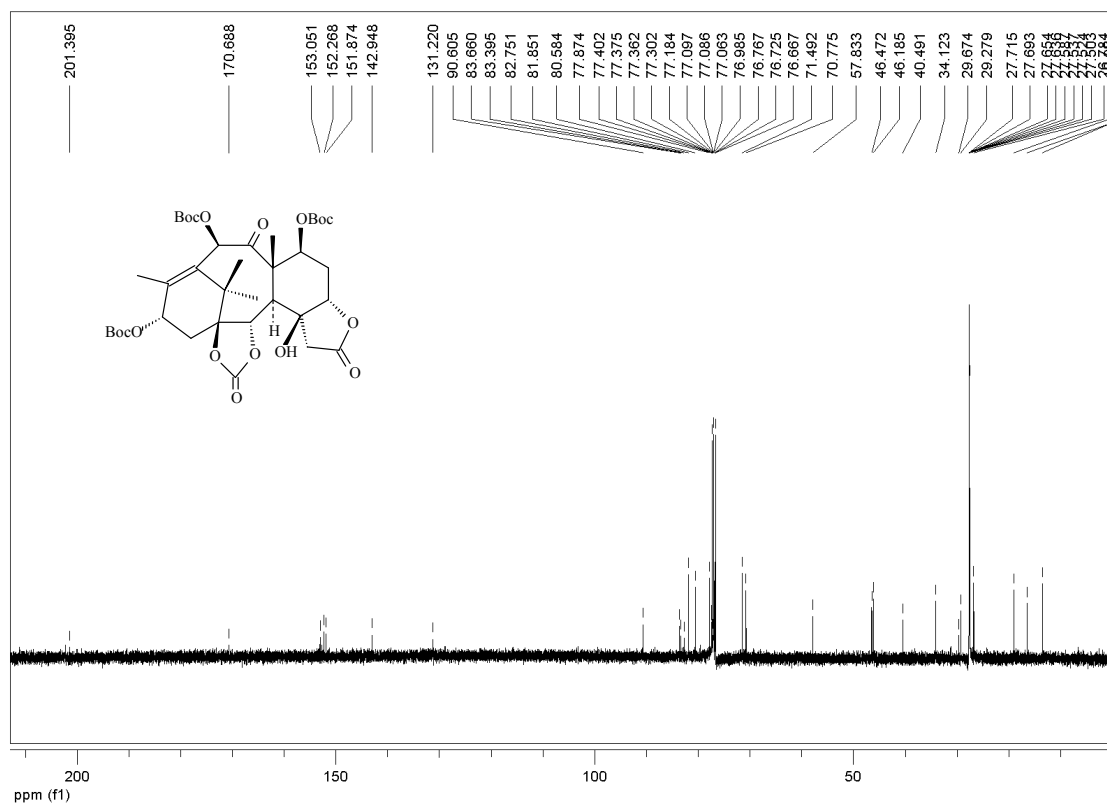

<sup>13</sup>C NMR spectrum of compound **15**

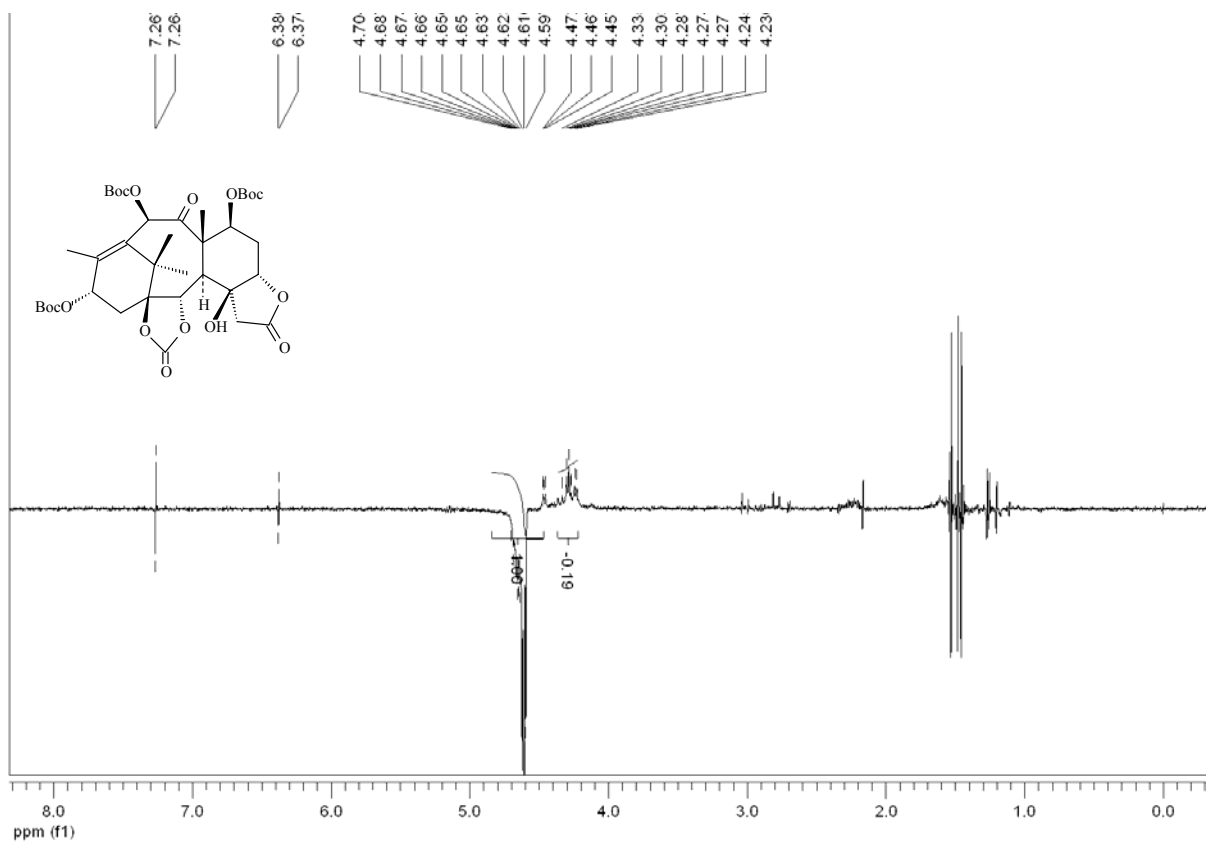

NOEds Spectrum of compound **15**

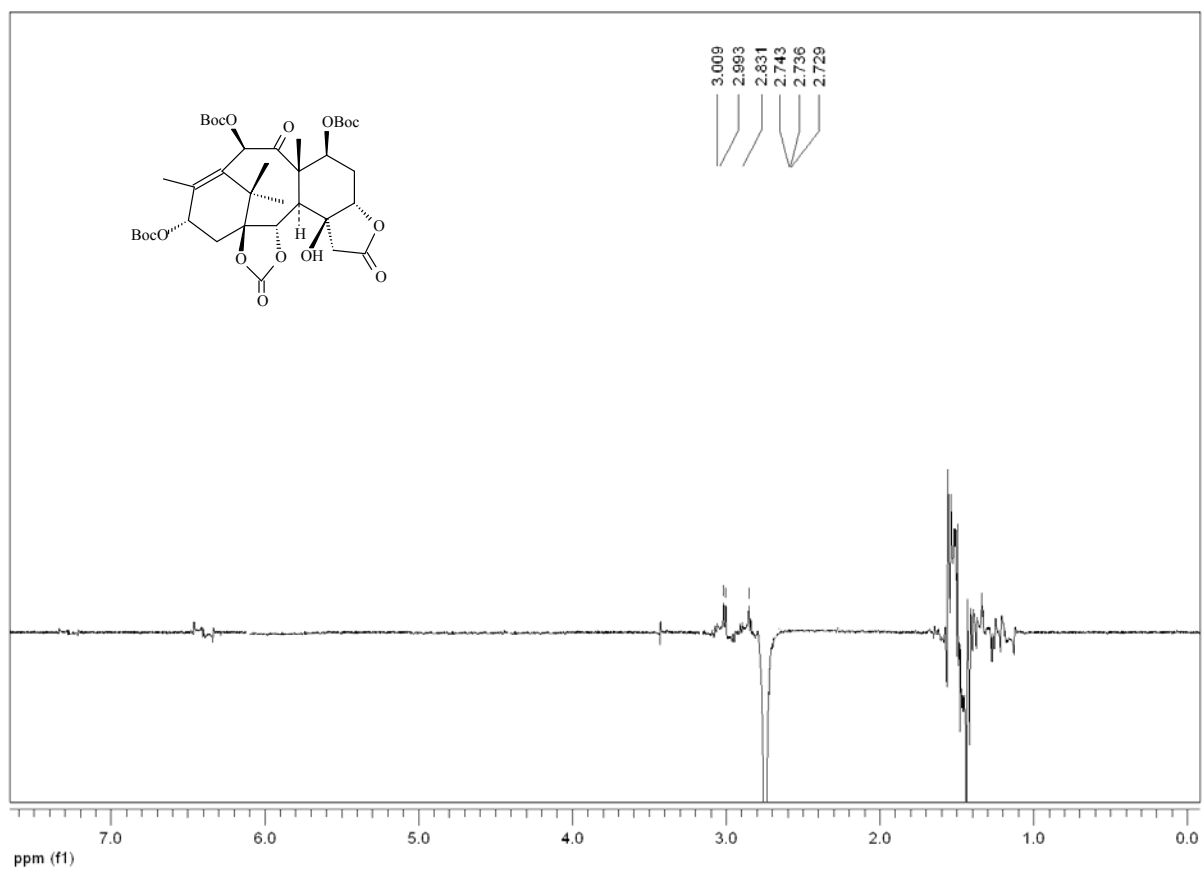

NOEds Spectrum of compound **15**

$^1\text{H}$ - $^1\text{H}$ cosy

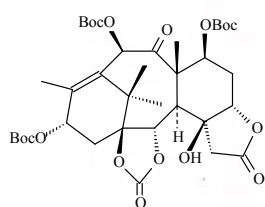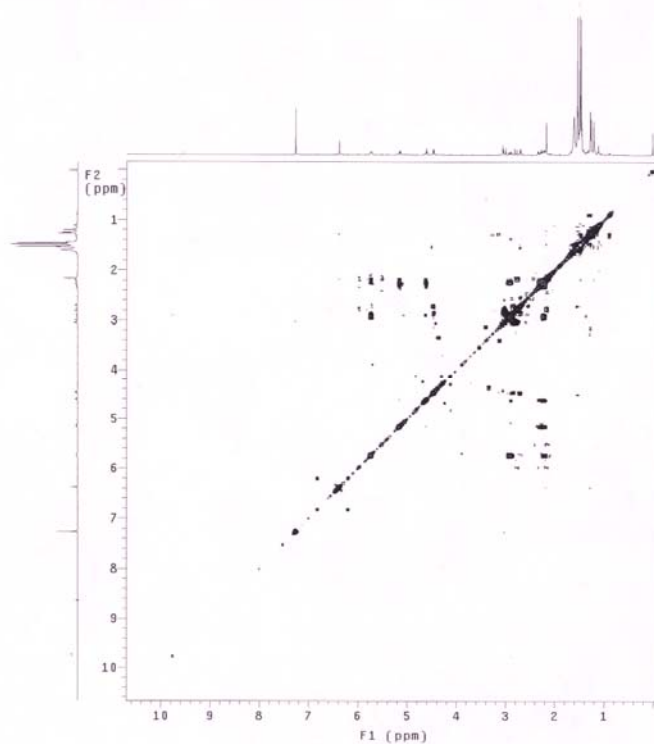

$^1\text{H}$ - $^1\text{H}$  COSY spectrum of compound **15**

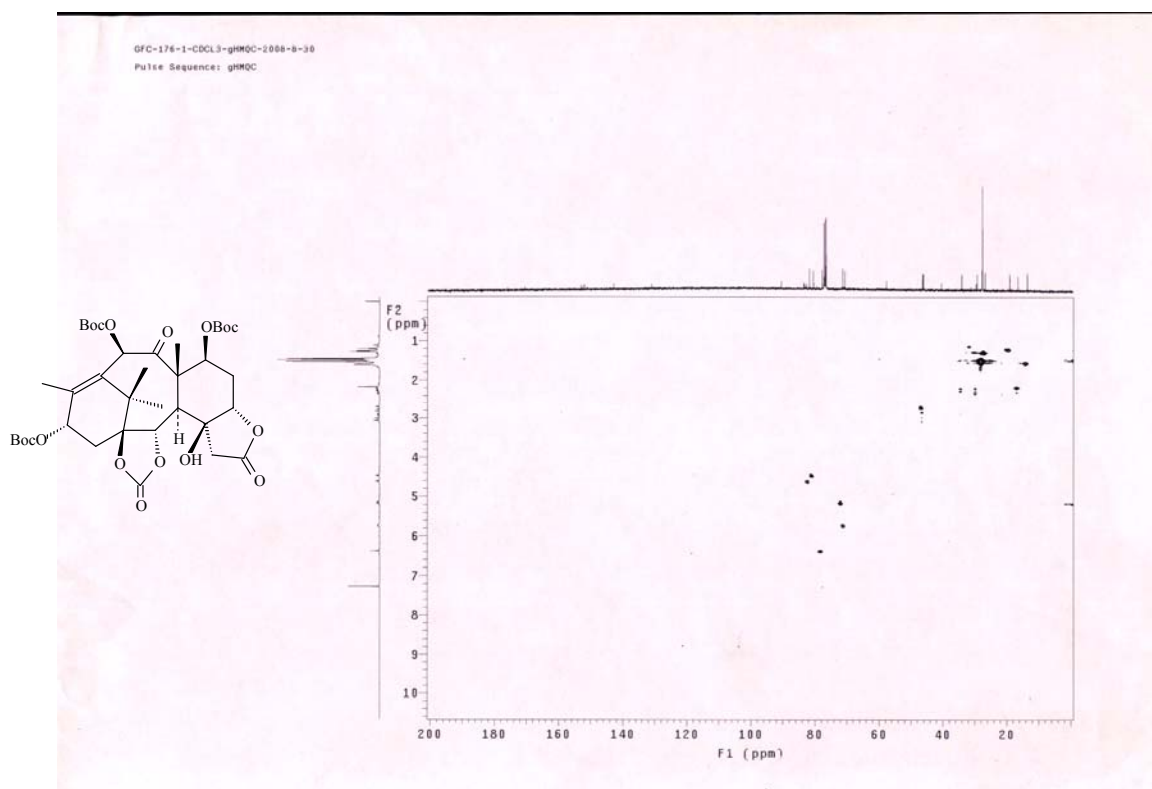

HMQC Spectrum of compound **15**

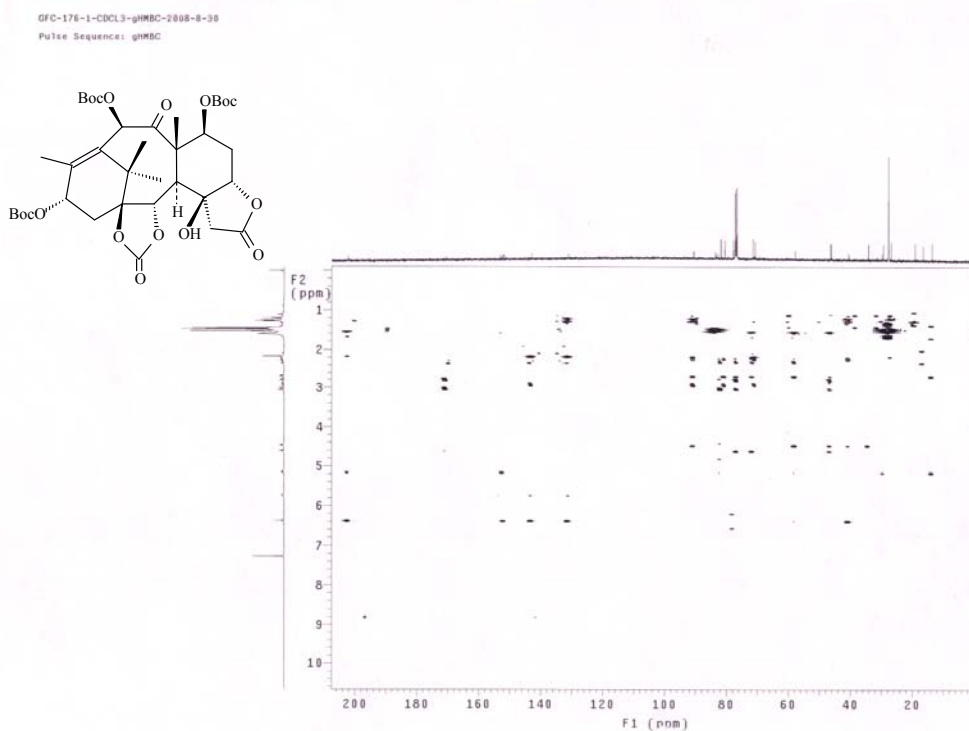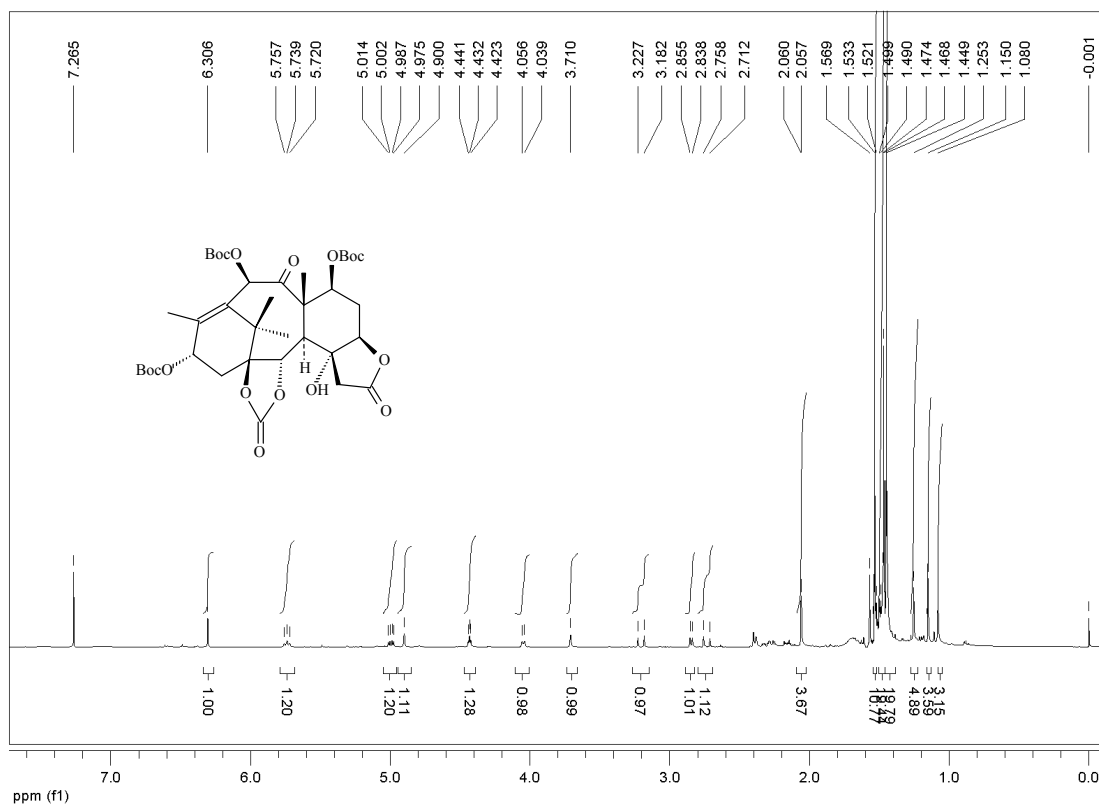

<sup>1</sup>H NMR spectrum of compound 16

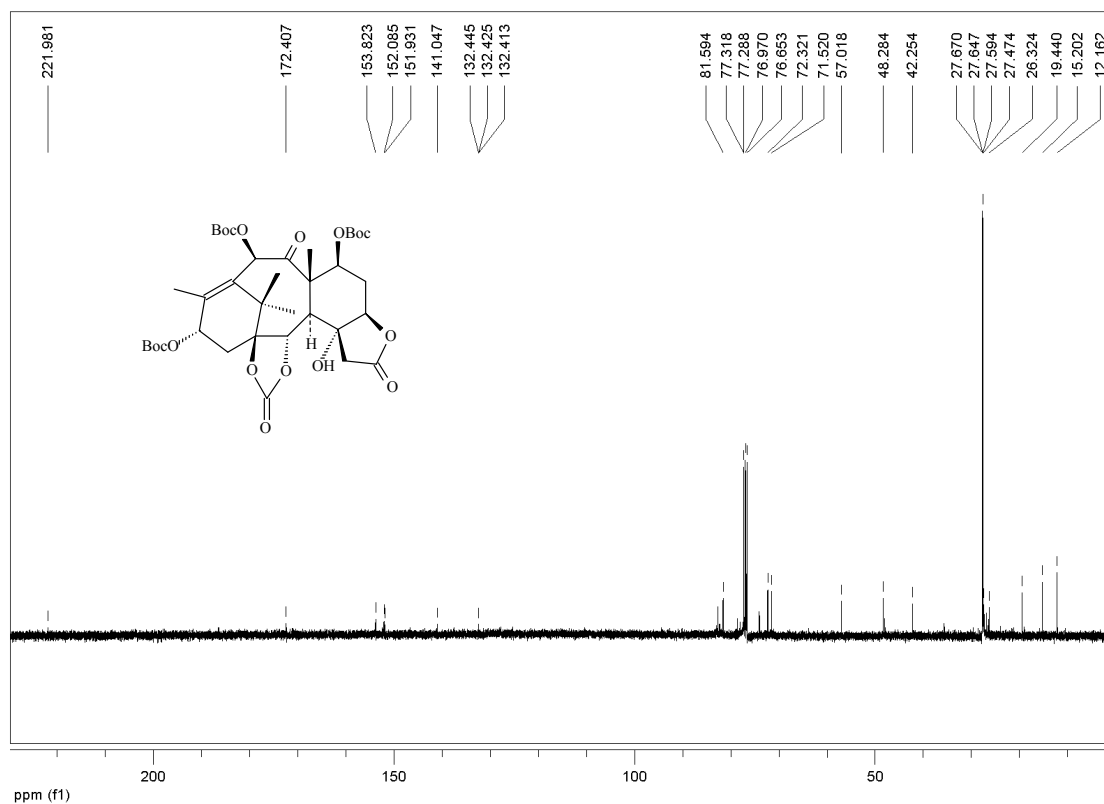

$^{13}\text{C}$  NMR spectrum of compound **16**

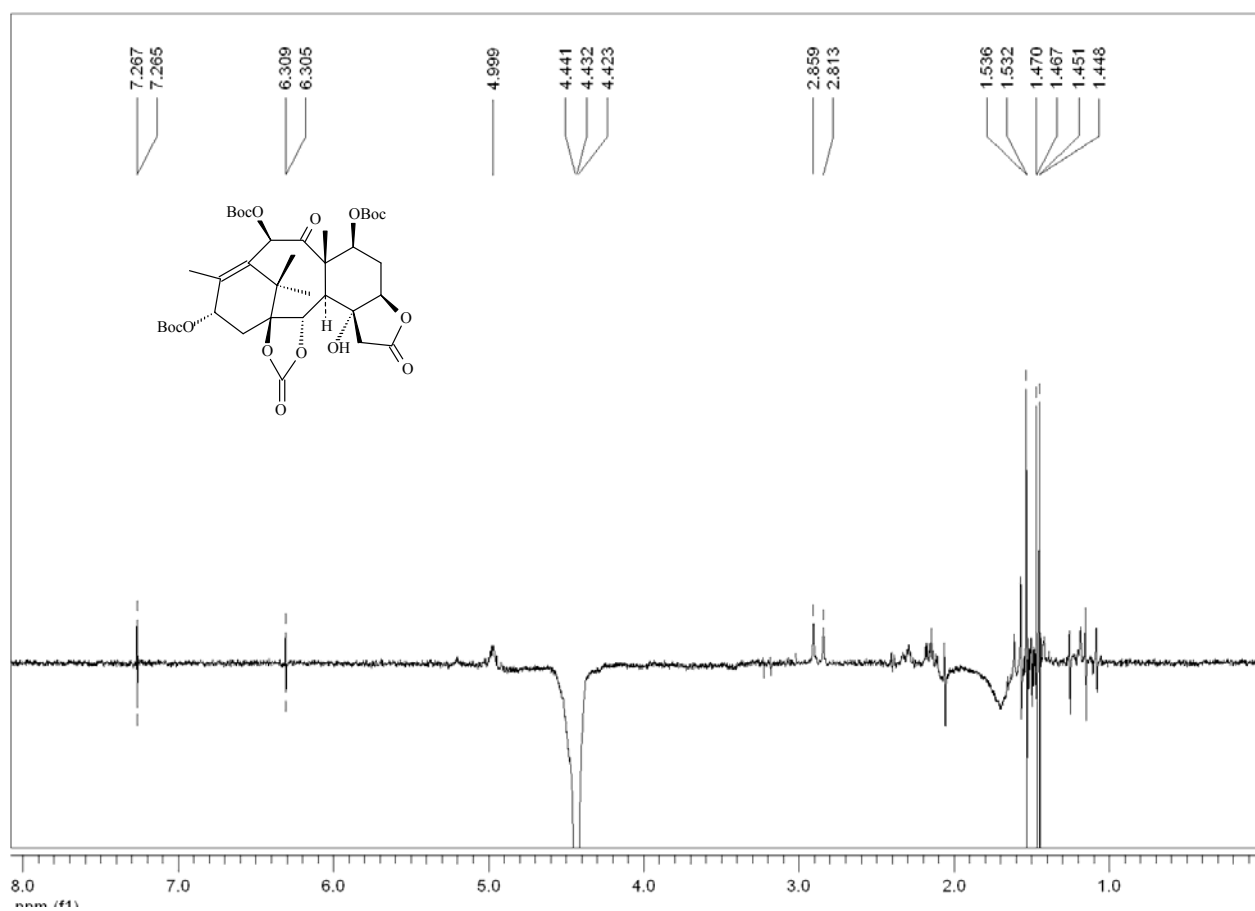

NOEs spectrum of compound **16**

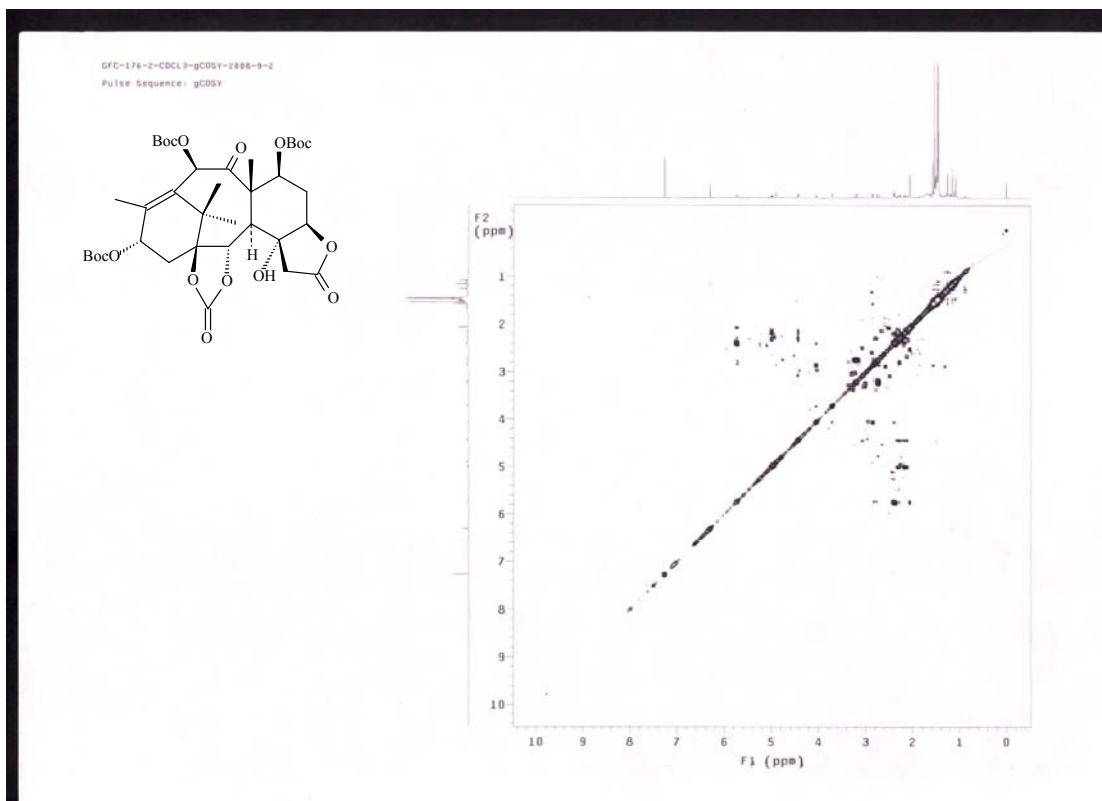

<sup>1</sup>H-<sup>1</sup>H COSY spectrum of compound 16

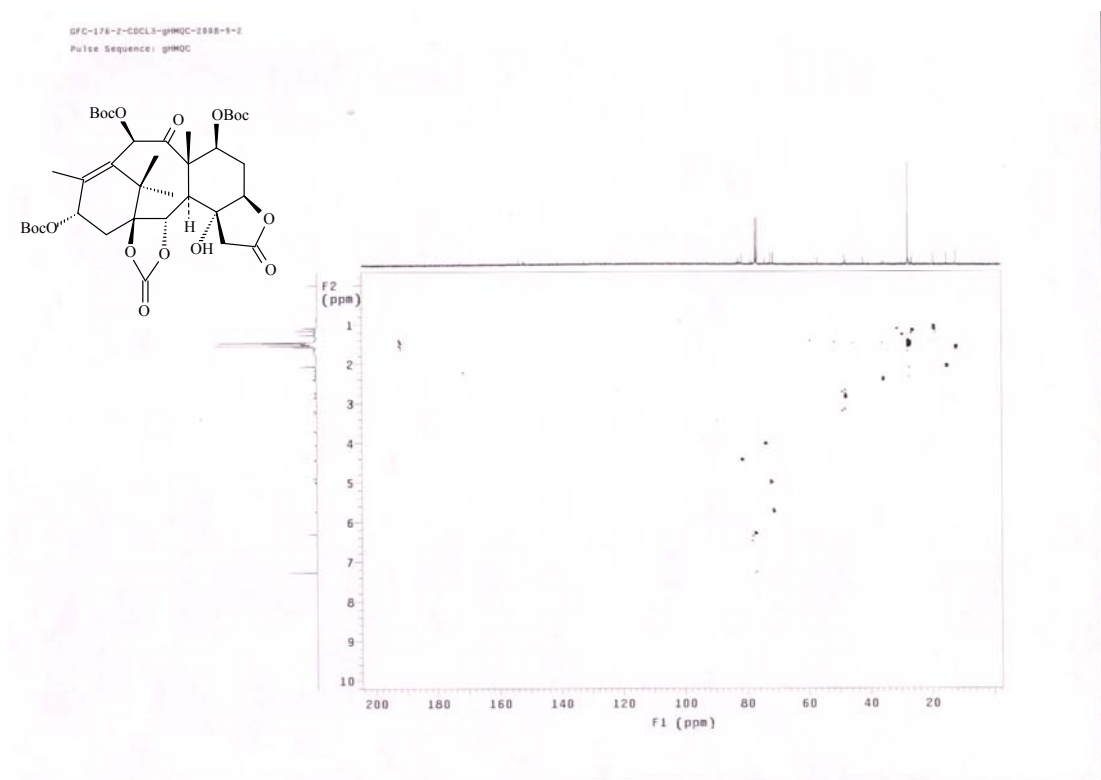

### HMQC spectrum of compound 16

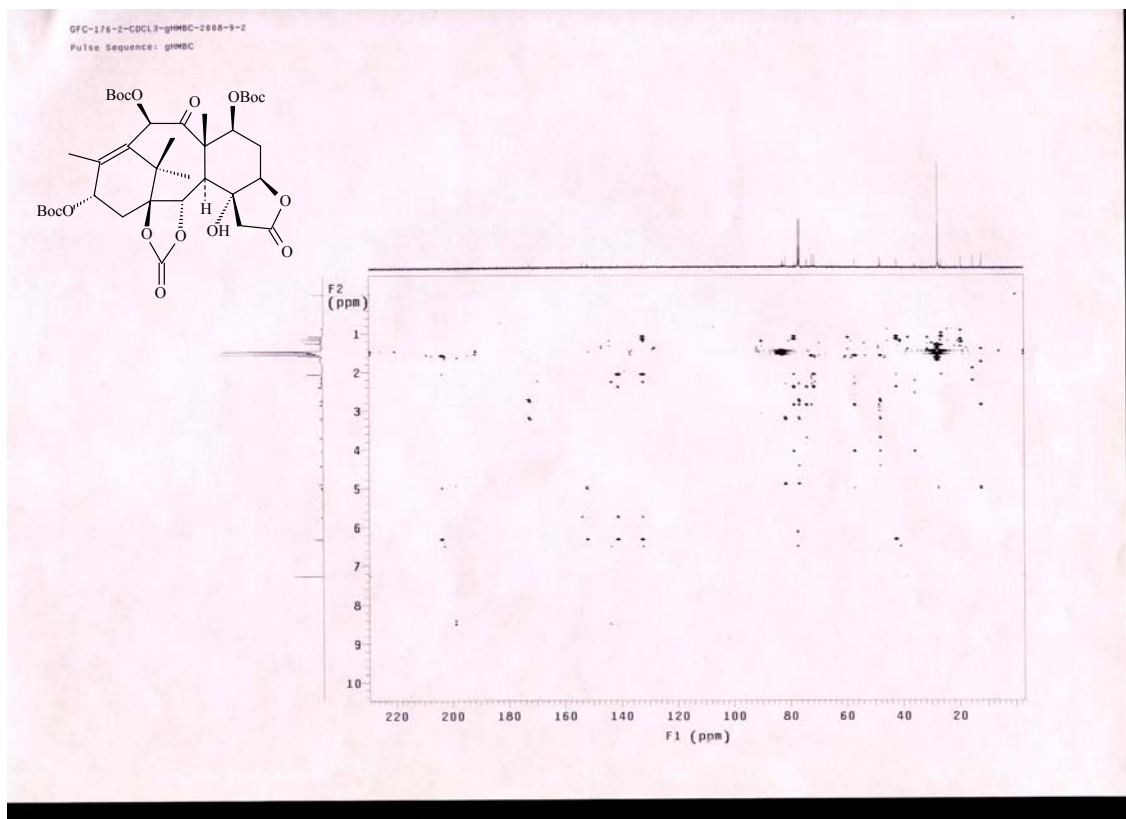

### HMBC spectrum of compound 16

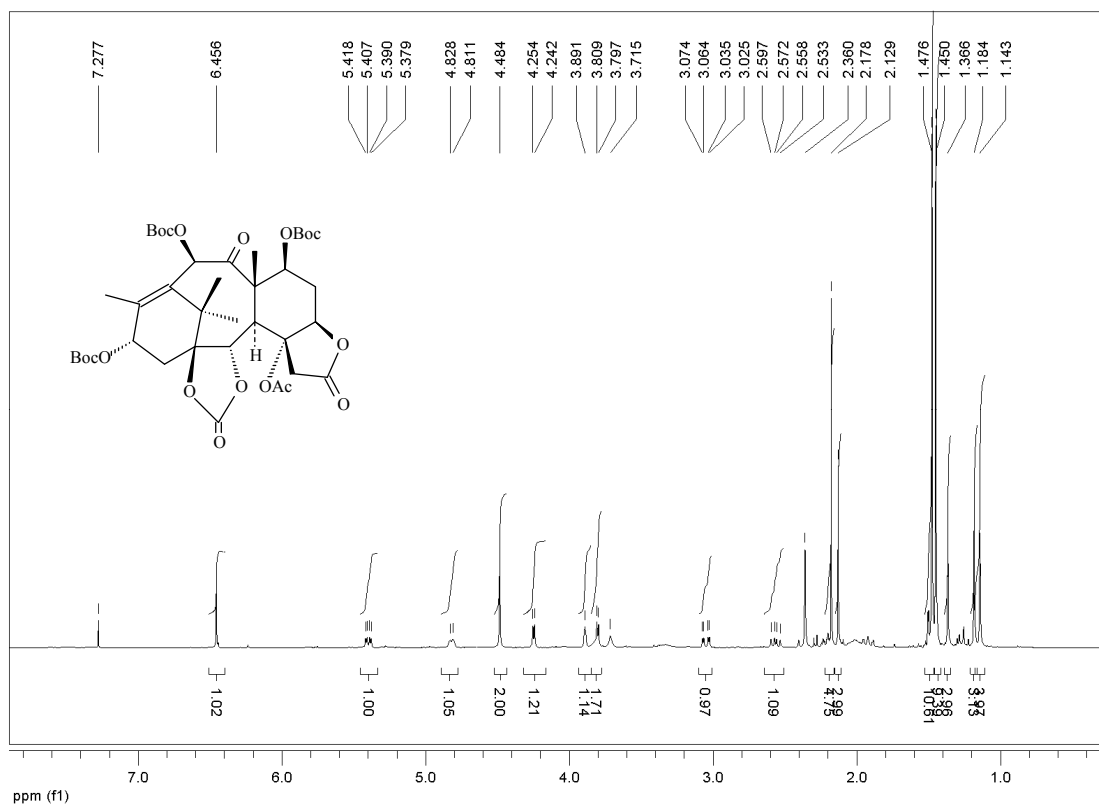

### <sup>1</sup>H NMR spectrum of compound 17



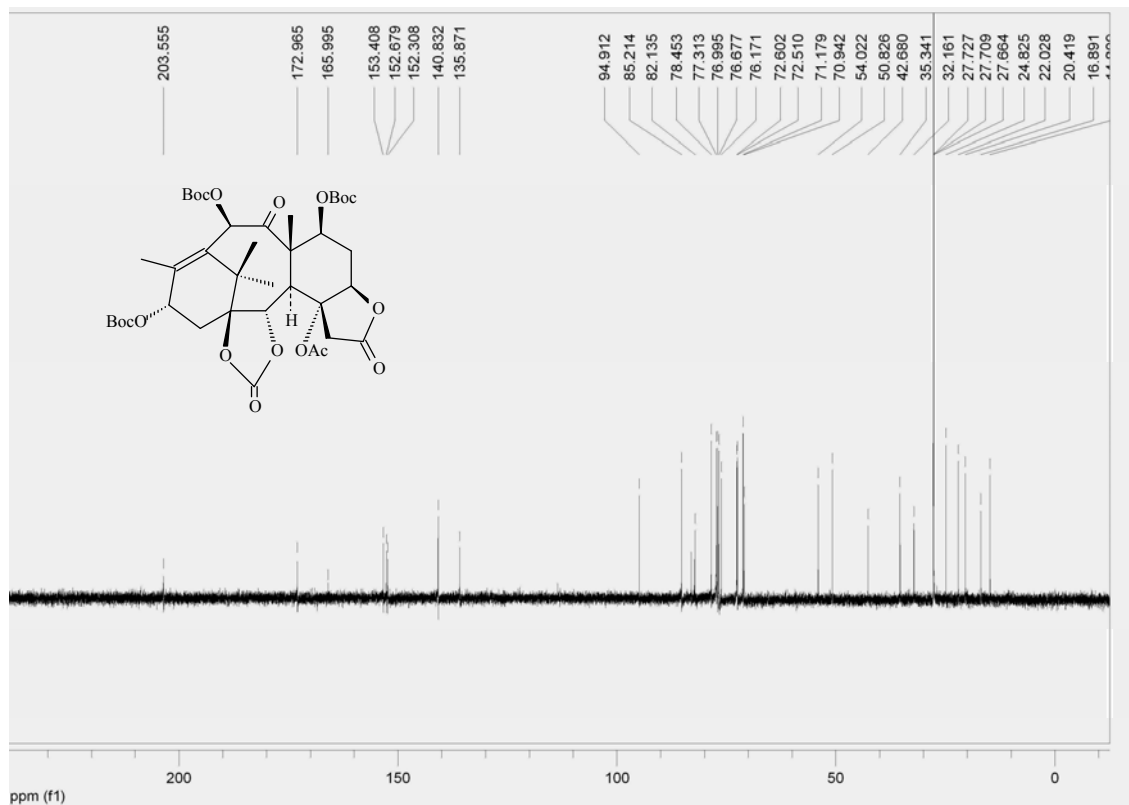

<sup>13</sup>C NMR spectrum of compound **17**

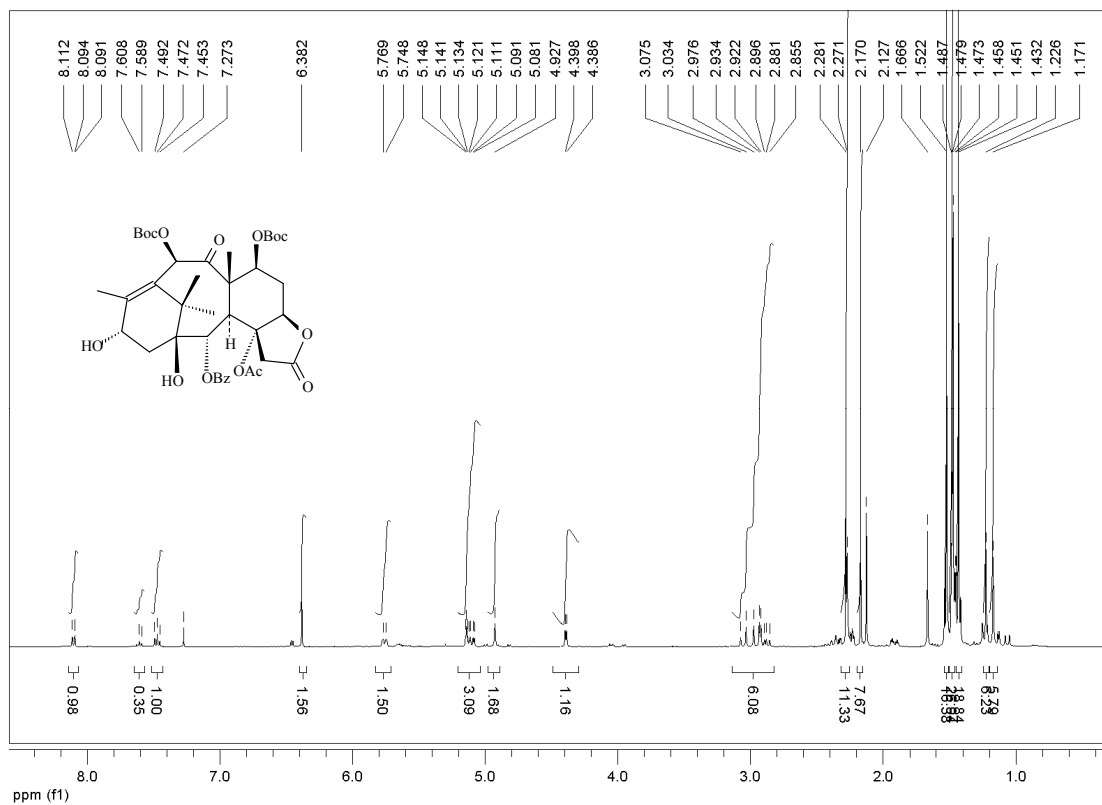

<sup>1</sup>H NMR spectrum of compound **18**

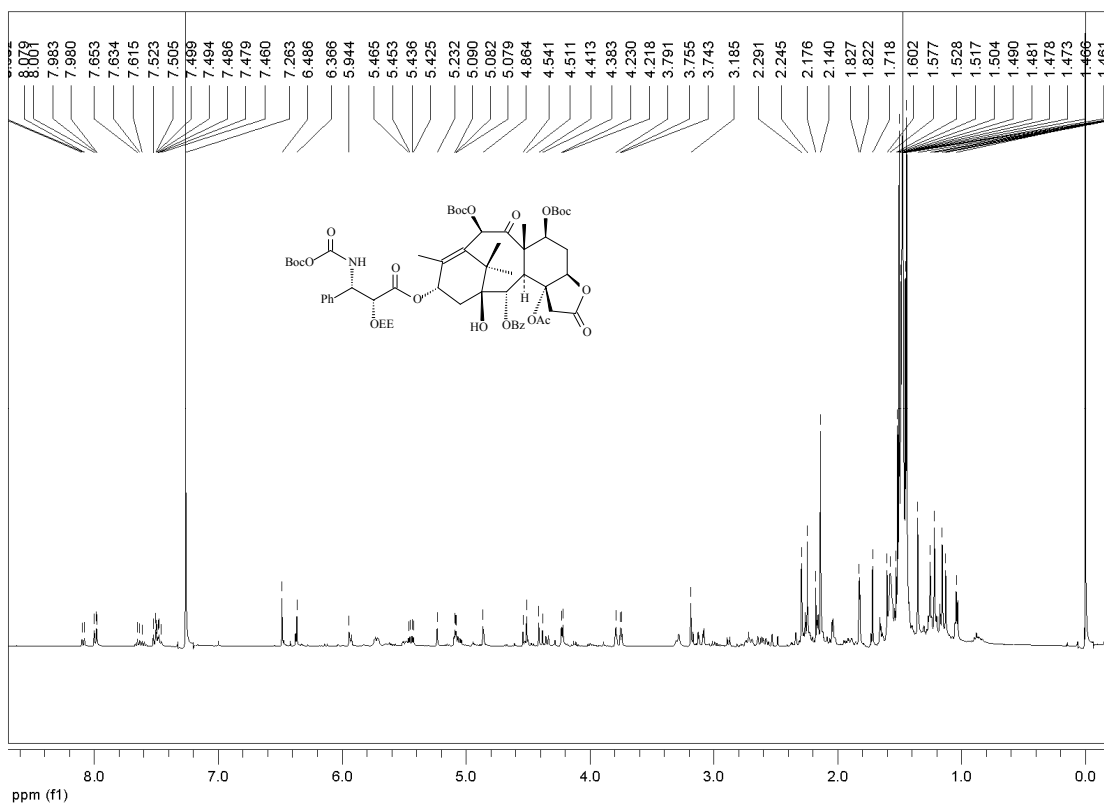

<sup>1</sup>H NMR spectrum of side chain linked product of compound **18**

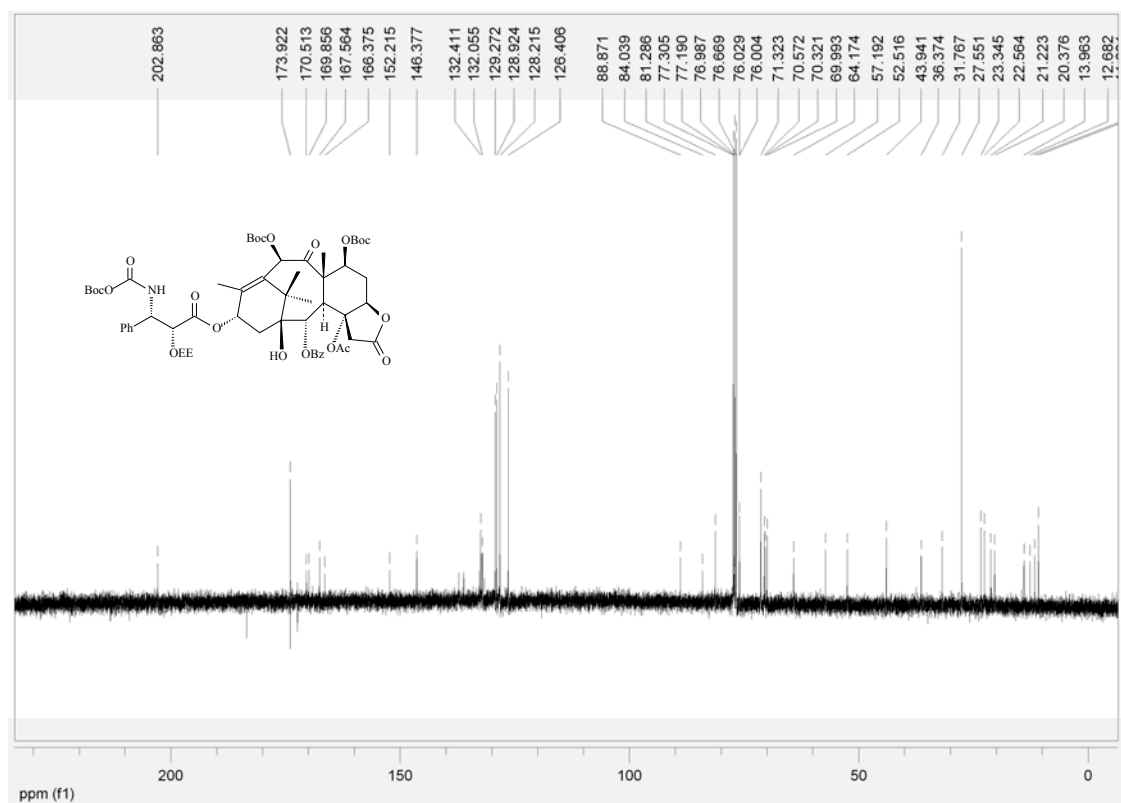

<sup>13</sup>C NMR spectrum of side chain linked product of compound **18**

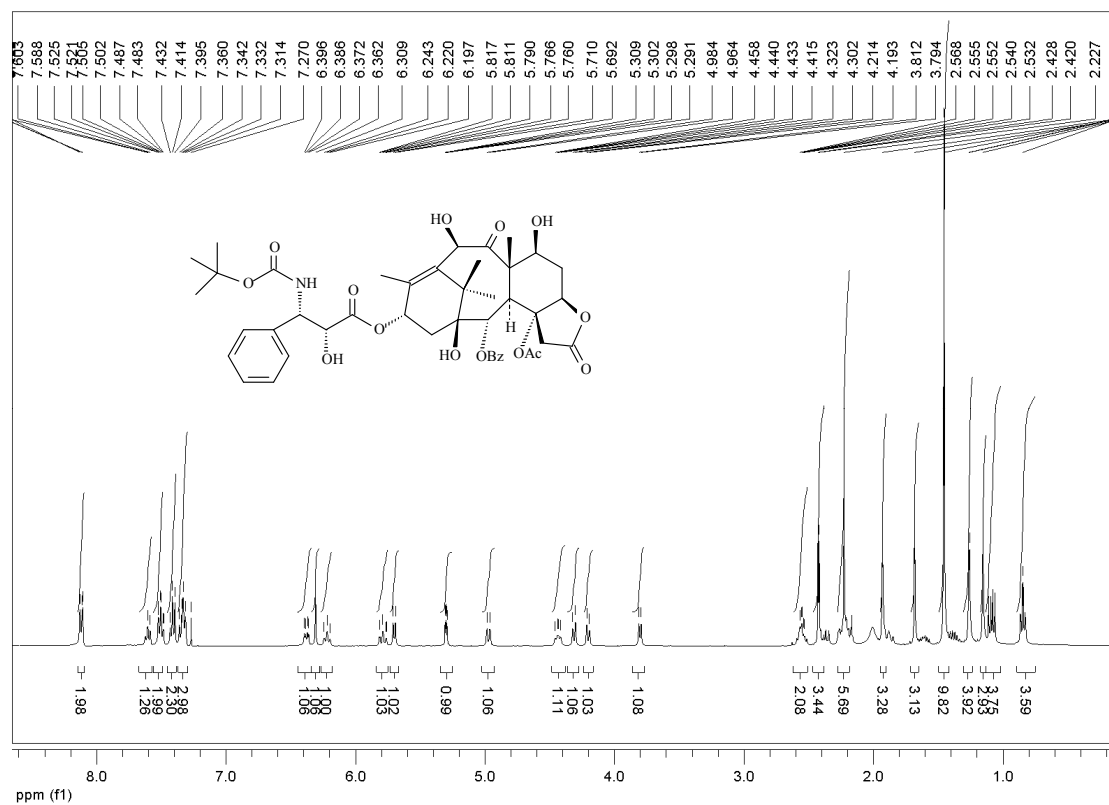

<sup>1</sup>H NMR spectrum of compound 20

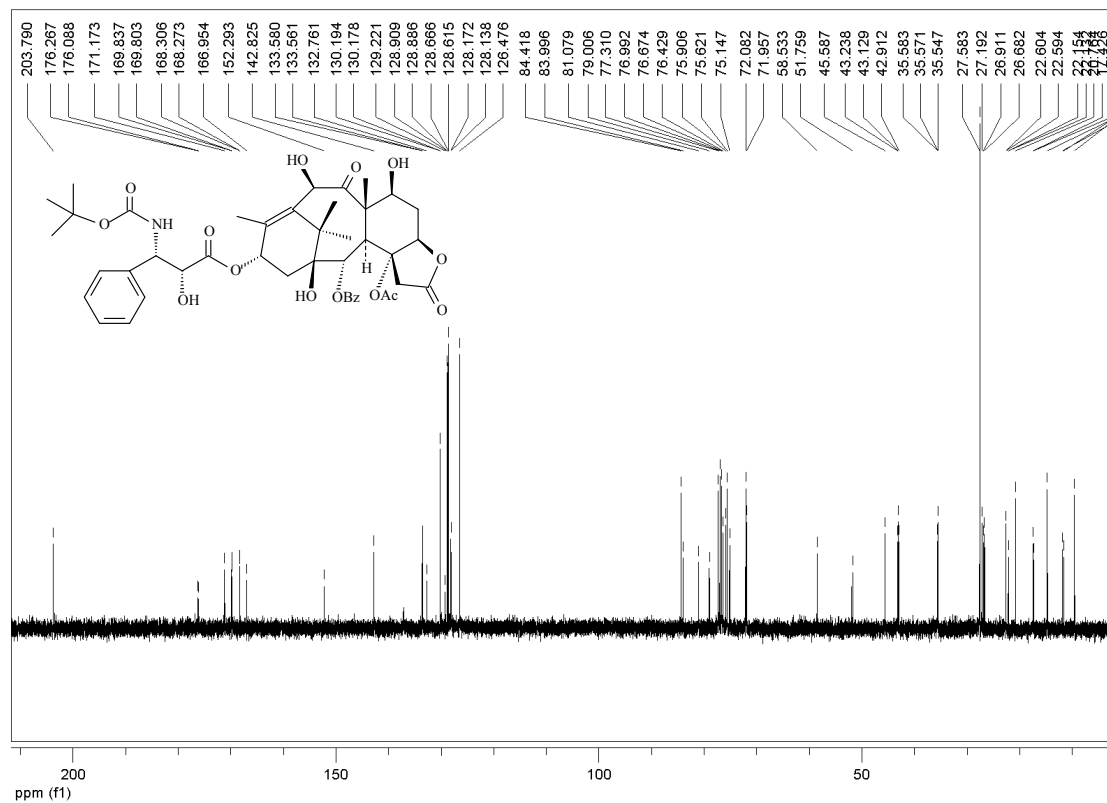

<sup>13</sup>C NMR spectrum of compound 20

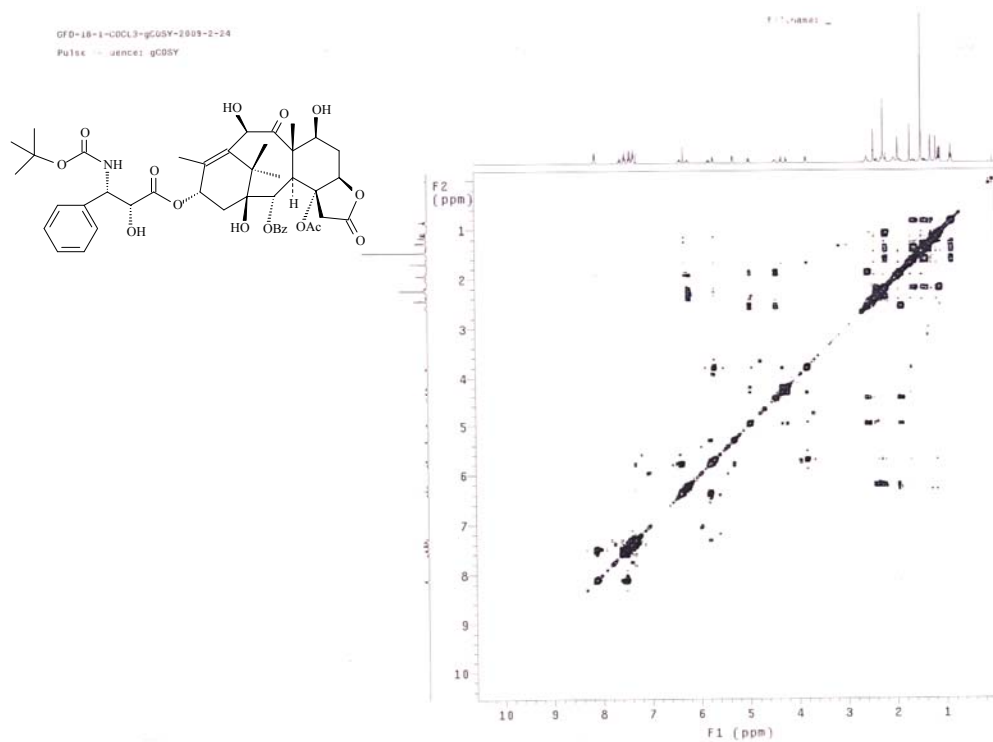

<sup>1</sup>H-<sup>1</sup>H COSY spectrum of compound **20**

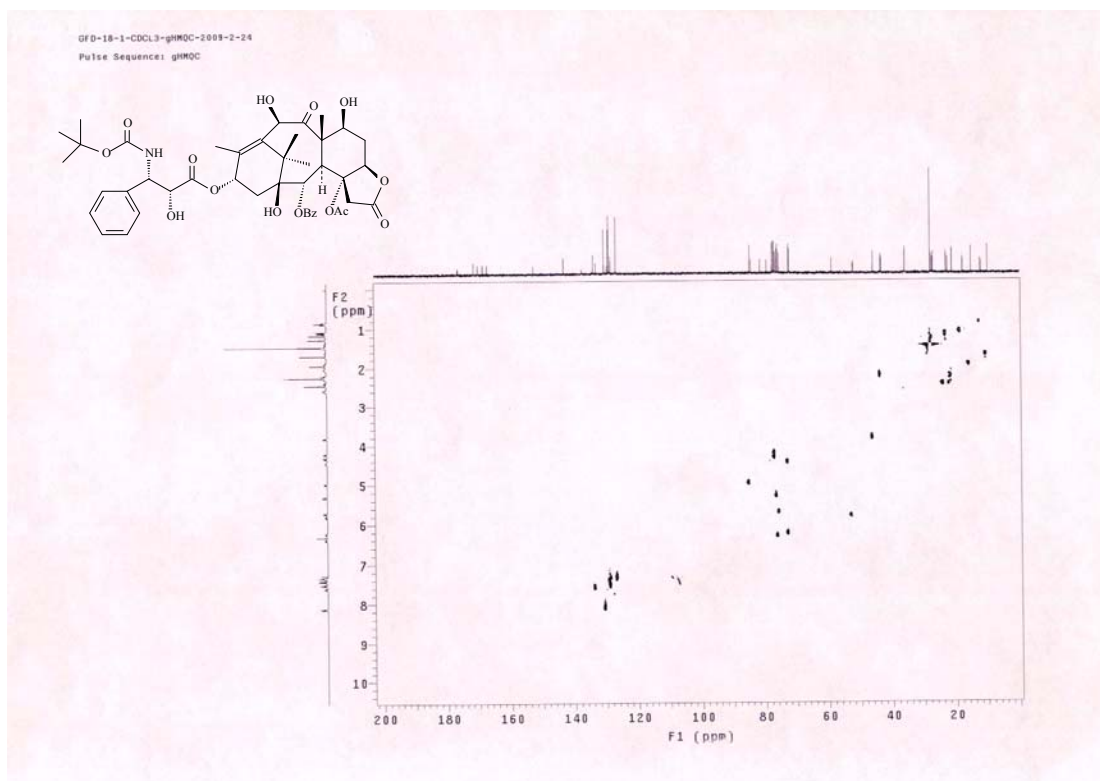

HMQC spectrum of compound **20**

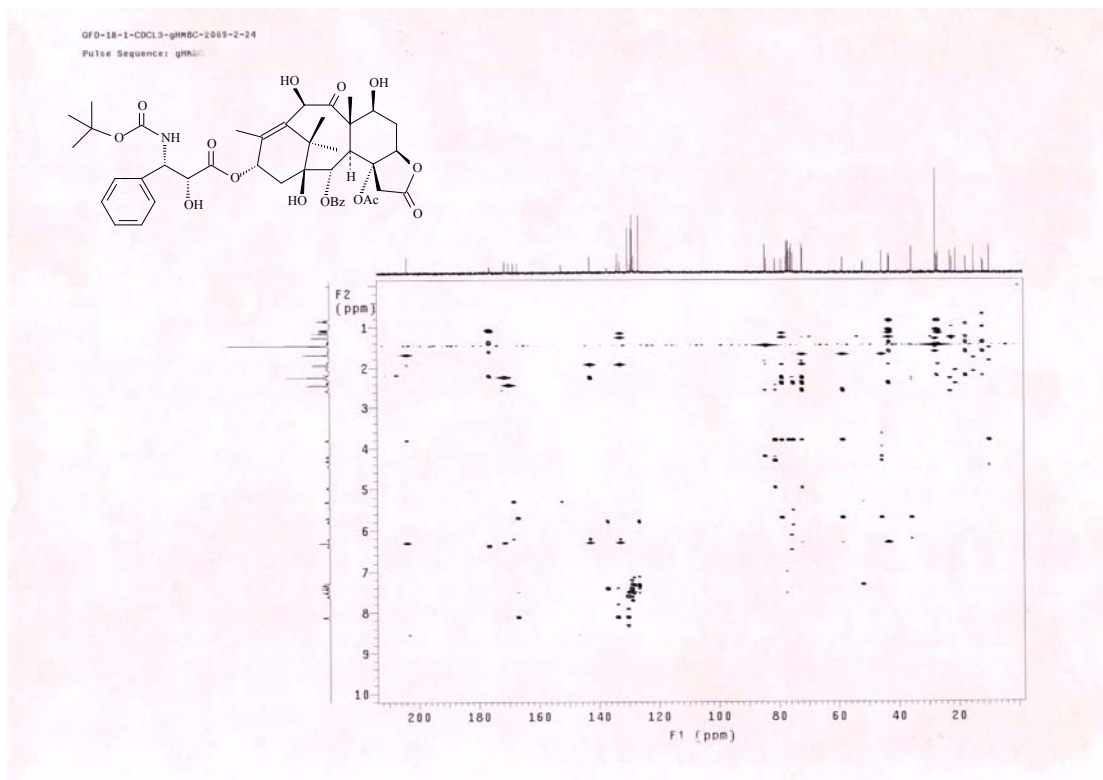

GFD-16 NOESY CDC13 2011-3-4

Pulse Sequence: NOESY

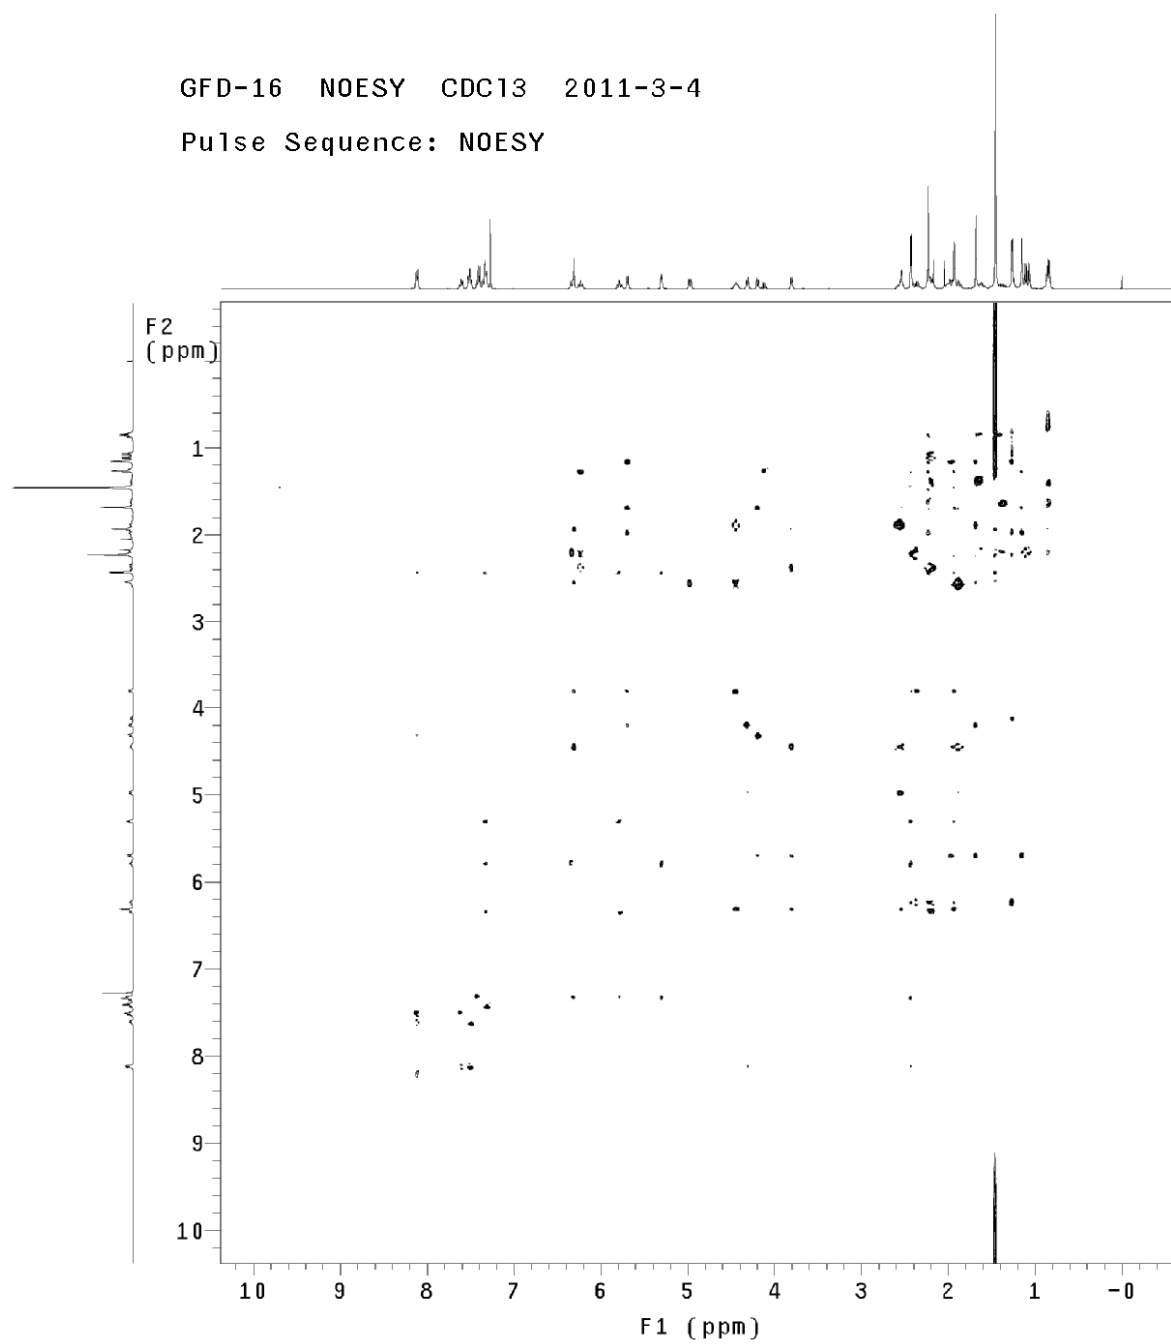

NOESY spectrum of compound **20**
